1 **SARS-CoV-2 infection paralyzes cytotoxic and metabolic functions of immune cells**

2  
3 Yogesh Singh<sup>1,2,6\*#</sup>, Christoph Trautwein<sup>3\*</sup>, Rolf Fendel<sup>4\*</sup>, Naomi Krickeberg<sup>4</sup>, Jana Held<sup>4</sup>,  
4 Andrea Kreidenweiss<sup>4</sup>, Georgy Berezhnoy<sup>3</sup>, Rosi Bissinger<sup>5</sup>, Stephan Ossowski<sup>1,2</sup>, Madhuri S.  
5 Salker<sup>6</sup>, Nicolas Casadei<sup>1,2</sup>, Olaf Riess<sup>1,2#</sup> and the Deutsche COVID-19 OMICS Initiative  
6 (DeCOI)

7  
8 <sup>1</sup>Institute of Medical Genetics and Applied Genomics, University of Tübingen, Calwerstrasse  
9 7, 72076, Tübingen, Germany

10  
11 <sup>2</sup>NGS Competence Center Tübingen (NCCT), University of Tübingen, Calwerstrasse 7, 72076  
12 Tübingen, Germany

13  
14 <sup>3</sup>Werner Siemens Imaging Center, University of Tübingen, Röntgenweg 13, 72076, Tübingen,  
15 Germany

16  
17 <sup>4</sup>Institute of Tropical Medicine, University Hospital of Tübingen, Tübingen, Wilhelmstrasse 27,  
18 72076, Tübingen, Germany

19  
20 <sup>5</sup>Department of Internal Medicine, Division of Endocrinology, Diabetology and Nephrology,  
21 University Hospital of Tübingen, Germany

22  
23 <sup>6</sup>Research Institute of Women's Health, University of Tübingen, Calwerstrasse 7/6, 72076,  
24 Tübingen, Germany

25  
26 \*Equal contributions

27  
28  
29 # Correspondence

30 Dr Yogesh Singh or Prof Olaf Riess

31 Institute of Medical Genetics and Applied Genomics, Tübingen University

32 Calwerstraße 7, 72076, Tübingen, Germany

33 Phone: 0049 7071 29 72257/78264 Fax: 0049 7071 29 25355

34 Email: [yogesh.singh@med.uni-tuebingen.de](mailto:yogesh.singh@med.uni-tuebingen.de) or [olaf.riess@med.uni-tuebingen.de](mailto:olaf.riess@med.uni-tuebingen.de)

35  
36  
37 **Key words:** COVID-19, CD8<sup>+</sup> T cells, Granzyme B, Perforin, Metabolites

38  
39  
40 **Short title:** Defective immune-metabolic functions in COVID-19 patient

49 **Abstract:**

50

51 The SARS-CoV-2 virus is the causative agent of the global COVID-19 infectious disease  
52 outbreak, which can lead to acute respiratory distress syndrome (ARDS). However, it is still  
53 unclear how the virus interferes with immune cell and metabolic functions in the human body.  
54 In this study, we investigated the immune response in 10 acute or convalescent COVID19  
55 patients. We characterized the peripheral blood mononuclear cells (PBMCs) using flow  
56 cytometry and found that CD8<sup>+</sup> T cells were significantly subsided in moderate COVID-19 and  
57 convalescent patients. Furthermore, characterization of CD8<sup>+</sup> T cells suggested that patients  
58 with a mild and moderate course of the COVID-19 disease and convalescent patients have  
59 significantly diminished expression of both perforin and granzyme B in CD8<sup>+</sup> T cells. Using <sup>1</sup>H-  
60 NMR spectroscopy, we characterized the metabolic status of their autologous PBMCs. We  
61 found that fructose, lactate and taurine levels were elevated in infected (mild and moderate)  
62 patients compared with control and convalescent patients. Glucose, glutamate, formate and  
63 acetate levels were attenuated in COVID-19 (mild and moderate) patients. Our findings reveal  
64 patients who suffer from an over activation of the immune system, a change of composition in  
65 infusion/intravenous fluids during infection with the aim to lower blood levels of glucose,  
66 glutamate, acetate and formate could avoid a life-threatening cytokine storm. In summary, our  
67 report suggests that SARS-CoV-2 infection leads to disrupted CD8<sup>+</sup> T cytotoxic functions and  
68 changes the overall metabolic functions of immune cells.

69

70

71

72

73

74

75

76

77

78

79

80

81

82

83

84

85

86

87

88

89

90

91

92

93

94

95

96

97 **Introduction:**

98 The first cases of severe acute respiratory coronavirus-2 (SARS-CoV-2) infection appeared in  
99 December 2019, in Wuhan, China<sup>1</sup>. This zoonotic virus has infected by now more than 26.1  
100 million people (03.09.2020) and killed more than 0.86 million<sup>2,3</sup> worldwide. The containment of  
101 the pandemic is challenging and is still continuing with roughly 200,000 or more new infections  
102 being reported daily since July 2020<sup>2,3</sup>. There is an urgent need for a better understanding of  
103 the immunopathology, as SARS-CoV-2 has become the leading cause of morbidity and  
104 mortality in many countries.

105  
106 Coronaviruses (CoV) are a large family of viruses that can cause illnesses such as the  
107 common cold and seasonal influenza<sup>4</sup>. Pathologically, SARS-CoV-2 infects angiotensin-  
108 converting enzyme 2 (ACE2)-expressing nasal epithelial cells in the upper respiratory tract  
109 and type II alveolar epithelial cells in patients exhibiting pneumonitis<sup>1,5</sup>. The most severe  
110 disease courses led to death frequently but not exclusively in older patients with and without  
111 risk conditions. The primary symptoms of SARS-CoV-2 infections are fatigue, fever, sore  
112 throat, dry cough, loss of smell and taste within 5-21 days of incubation of the virus<sup>6-9</sup>. COVID-  
113 19 symptoms are heterogeneous and range from asymptomatic to mild, moderate, and severe  
114 pathological symptoms, presenting with or without pneumonia<sup>10,11</sup>, however, most infected  
115 people develop mild to moderate illness and recover without hospitalization<sup>12,13</sup>. Primarily the  
116 older COVID-19 patients can develop acute severe respiratory distress syndrome (ARDS) due  
117 to a cytokine storm which is a life-threatening situation, requiring ventilation and intensive care  
118 support<sup>14-18</sup>. High serum levels of IL-6, IL-8, IL-10, TNF- $\alpha$  cytokines and an immune hyper-  
119 responsiveness referred to as a 'cytokine storm' is connected with poor clinical outcome<sup>19,20</sup>.

120  
121 Several break-through discoveries have extended our understanding how the virus takes  
122 advantage of the host and modulates immunity<sup>12,17,21-25</sup>. Recovered COVID-19 patients have  
123 an increased number of antibody-secreting cells, activated CD4<sup>+</sup> and CD8<sup>+</sup> T cells, and  
124 immunoglobulin M (IgM) and SARS-CoV-2 reactive IgG antibodies were detected in blood  
125 before full symptomatic recovery<sup>26-28</sup>. Most severely affected COVID-19 patients had a lower  
126 T cell but elevated B cell counts<sup>13,19,29,30</sup>. Interestingly, patients with mild symptoms were  
127 shown to have increased T and B cells compared with severely affected patients<sup>26,29-31</sup>. There  
128 could be several reasons for different disease outcomes including over-activated innate or  
129 hyper-activated adaptive immune responses leading to cytokine storms and resulting in  
130 severe injury to the lungs<sup>10,13,25,32</sup>. Despite of several ongoing efforts, the immunological  
131 mechanisms of the host-pathogen interaction are not well understood<sup>33</sup>.

132  
133 There is an intricate balance between the metabolic state of immune cells and generation of  
134 immune response<sup>17,34-37</sup>. CD8<sup>+</sup> T cells require energy to proliferate and accomplish their  
135 effective functions<sup>38</sup>. Most propagating cells such as lymphocytes utilize the most abundant  
136 energy substrates including, glucose, lipids, and amino acids<sup>39</sup>. In response to SARS-CoV-2  
137 and other virus infections, CD8<sup>+</sup> T cells play a pivotal role in profound growth and proliferation  
138 to generate their effective functional cells which can produce copious amounts of effector  
139 molecules such as cytokines and cytotoxic granules<sup>30,38-40</sup>. An activated immune system is  
140 coupled with a change in metabolic reprogramming to produce enough energy needed during  
141 (viral) infection<sup>38,39</sup>. Proliferating T cells ferment glucose to lactate even in the presence of  
142 oxygen to meet high energy demands<sup>34,37-39</sup>. Furthermore, glucose and glutamine are involved  
143 in the hexosamine biosynthetic pathway, which regulates the production of uridine

144 diphosphate N-acetyl glucosamine necessary for T cell clonal expansion and function<sup>41</sup>. The  
145 synthesis of lactate intracellularly is crucial for T cells to have an increased glycolytic flux<sup>38</sup>.

146

147 Peripheral blood mononuclear cells (PBMCs) can be analyzed to measure the health status  
148 of an individual and can serve as a health biomarkers<sup>42</sup>. Therefore, the metabolic status of  
149 lymphocytes could help to predict disease severity or to select the optimal therapeutic  
150 intervention to boost the immune function during infection. Generally, most of the metabolism-  
151 related functions in PBMCs during SARS-CoV-2 infections were inferred based on  
152 transcriptomics analysis<sup>34,43</sup> and no functional data (biochemical level) have been presented.  
153 Thereof, understanding the kinetics of adaptive immune response as well as the metabolic  
154 functions during SARS-CoV-2 infections will help to elucidate the host immune response to  
155 SARS-CoV-2 infection. In this study, using flowcytometry and proton nuclear magnetic  
156 resonance (<sup>1</sup>H-NMR) spectroscopy, we characterized the PBMCs from SARS-CoV-2 infected  
157 and convalescent patients for the their immunophenotypic and metabolic functions.

158

## 159 **Results:**

160

### 161 *Characteristics of study participants*

162

163 PBMCs were isolated and cryopreserved from blood samples obtained from COVID-19  
164 patients suffering from mild ('Mild (outpatient)') or moderate/severe ('Moderate (inpatient)')  
165 disease or were already recovered ('Convalescent') and from healthy controls ('HC').  
166 Classification of disease severity for this analysis was based on the requirement of  
167 hospitalization. Patients with mild COVID-19 were recruited within three days after  
168 confirmation of infection by RT-qPCR. From moderate to severe COVID-19 patient blood  
169 samples were collected one week after their admittance. The moderate patients were admitted  
170 to the hospital requiring medical care, however, they did not need ventilation or O<sub>2</sub> supply.  
171 Recovered patients were included based on a positive SARS-CoV-2 antibody testing. Study  
172 participant characteristics are described in Table 2.

173

### 174 *Immunophenotyping of COVID-19 mild, moderate and convalescent COVID-19 patients*

175

176 To compare the number of lymphocytes and monocytes amongst the four study groups,  
177 PBMCs were stained and analysed by flow cytometry. Both, lymphocytes (p=0.005) and  
178 monocytes (p=0.04), were significantly decreased in moderate COVID-19 patients compared  
179 with HC (Suppl. Fig. 1a, b). However, mild and convalescent patients also had a reduced, but  
180 not significantly reduced, count of lymphocytes/monocytes compared to HC.

181

### 182 *Increased inflammatory monocytes and reduced NK cells in moderate COVID-19 patients*

183

184 Monocytes were further classified into classical, non-classical and intermediate based on  
185 expression of CD14 and/or CD16 and we used the same gating strategies as described  
186 earlier<sup>44</sup> (Suppl. Fig. 1c). We found that CD16<sup>++</sup>CD14<sup>+</sup> patrolling (non-classical) monocytes  
187 were significantly increased (p=0.0008) in numbers in moderate patients compared to HC,  
188 whereas this number is decreased again significantly compared with convalescent patients  
189 (p=0.01) (Fig. 1a). The percentage of CD16<sup>++</sup>CD14<sup>+</sup> monocytes was also significantly  
190 increased (p=0.006) in mild patients (outpatients) compared with moderate patients (Fig. 1a  
191 Panel I). Interestingly, CD16<sup>++</sup>CD14<sup>++</sup> pro-inflammatory monocytes (intermediate) were again

192 significantly increased in moderate ( $p=0.003$ ) compared with HC as well as between mild and  
193 HC ( $p=0.02$ ) (Fig. 1a panel II). Furthermore, we observed a significantly reduced percentage  
194 of CD14<sup>++</sup>CD16<sup>-</sup> phagocytic monocytes (classical) in moderate compared with mild  
195 ( $p=0.0009$ ), HC ( $p<0.0001$ ) and convalescent ( $p=0.0003$ ) patients (Fig. 1a Panel III). Finally,  
196 we explored the lymphoid cells compartment for NK cells (CD56<sup>+</sup>CD3<sup>-</sup>CD19<sup>-</sup>). We found that  
197 both mild ( $p=0.0003$ ) and moderate ( $p=0.0002$ ) patients were significantly different from  
198 convalescent and HC ( $p<0.0001$ ; HC vs mild or moderate) patients (Fig. 1b).

199

#### 200 *Dynamics of B and T cells in mild, moderate and convalescent patients*

201

202 Both T and B cells are indispensable for the immune response against viral infections such as  
203 SARS-CoV-2. Firstly, we compared the number of B cells amongst the study groups, which  
204 give rise to virus-specific antibodies (see gating strategy in Suppl. Fig. 1c). The CD19<sup>+</sup>CD3<sup>-</sup>  
205 cells (B cells) were significantly increased in mild ( $p=0.008$ ; 1.7x times) and moderate  
206 ( $p=0.0008$ ; 1.9x times) patients compared with HC (Fig. 2a). Whilst, B cells were significantly  
207 decreased in moderate compared to convalescent ( $p=0.03$ ) patients (Fig. 2a). Comparing  
208 CD3<sup>+</sup>CD19<sup>-</sup> lymphocytes among the different patient groups we observed no significant  
209 difference. However, there was an increased trend of CD3<sup>+</sup> cells in the outpatients, inpatients  
210 and convalescent groups compared with HC.

211

212 CD3<sup>+</sup> cells were analysed for the CD4<sup>+</sup> and CD8<sup>+</sup> T cell compartment. There was a tendency  
213 of increased CD4<sup>+</sup> T cells for outpatients, inpatients and convalescent patients compared to  
214 HC, but no significant difference was observed among any of the groups. CD8<sup>+</sup> T cells were  
215 significantly different between HC compared to moderate ( $p=0.04$ ) or convalescent ( $p=0.04$ )  
216 patients (Fig. 2b). Finally, we characterized CD4<sup>+</sup>Foxp3<sup>+</sup>CD45R<sup>-</sup> regulatory T cells (Tregs),  
217 however, no significant difference was observed among the different groups (Suppl. Fig. 2).

218

#### 219 *Impaired activation and defective cytotoxic functions of CD8<sup>+</sup> T cells*

220

221 We found that the percentage of CD8<sup>+</sup> T cells was decreased in mild and convalescent  
222 patients compared to HC. Thus, we explored the activation status of CD8<sup>+</sup> T cells based on  
223 HLA-DR expression. We found that CD8<sup>+</sup> T cell activation status in all three groups of infected  
224 patients were significantly different from HC (mild  $p=0.01$ , moderate  $p=0.009$ , and  
225 convalescent  $p=0.008$ , Fig. 3a). We characterized the cytotoxic potential of CD8<sup>+</sup> T cells based  
226 on granzyme B and perforin levels and found that there was a tendency of decreased  
227 granzyme B expression in mild, moderate and convalescent patients compared with HC (Fig.  
228 3b), however it did not reach significance. Perforin was significantly decreased in convalescent  
229 ( $p=0.03$ ) patients compared with HC (Fig. 3b), although mild patients also had borderline  
230 significantly reduced levels ( $p=0.06$ ). Furthermore, we studied the expression of CD38, a  
231 marker of cell activation, which was significantly upregulated in convalescent patients  
232 compared with HC ( $p=0.01$ ), mild ( $p=0.03$ ) and moderate ( $p=0.02$ ) patients (Fig. 4a). Similarly,  
233 convalescent patients had significantly increased numbers of CD38<sup>+</sup>PD-1<sup>+</sup> cytotoxic CD8<sup>+</sup> T  
234 cells compared with HC ( $p=0.005$ ), moderate ( $p=0.002$ ) and mild ( $p=0.002$ ), which reflects the  
235 exhaustion and non-responsiveness (anergy) of CD8<sup>+</sup> T cells (Fig. 4b). Overall, our data  
236 suggested that CD8<sup>+</sup> T cells have reduced activation, diminished expression of cytotoxic  
237 molecules such as perforin and granzyme B and severely exhausted phenotype.

238

#### 239 *Dynamics of metabolites production in mild, moderate and convalescent patient*

240 PBMCs from all patient groups were subjected to <sup>1</sup>H-NMR spectroscopy analysis. We  
 241 identified and quantified a total of 18 metabolites (Fig. 5a). Hereby, unsupervised PCA showed  
 242 that spectral data from mild and moderate patients formed overlapping clusters clearly distinct  
 243 from a cluster formed by HC and convalescent patients (Fig. 5b), indicating a strong difference  
 244 in metabolite levels between infectious state compared to healthy or recovered state.  
 245 Statistical analysis of the four different groups, revealed that 15 metabolites showed p-values  
 246 < 0.05, with highest significance for metabolites from the energy metabolism (Fig. 5c, Suppl.  
 247 Fig. 3 & Table 1). The data indicate a strong consumption of glucose, acetate, formate during  
 248 infection, while with lactate levels are increased. Furthermore, we also found very high levels  
 249 of fructose in PBMCs from mild patients, medium concentrations in moderate and, low levels  
 250 in HC and convalescent patients (Fig. 5c). Furthermore, glutamate was almost abolished in  
 251 mild and moderate patients, potentially as a consequence of enhanced production of α-  
 252 ketoglutarate in the TCA cycle in PBMCs *via* glutamate dehydrogenase (Fig. 5c).

253  
 254 To find an association between different metabolites, we applied the variable importance of  
 255 projection (VIP) score. We found that formate and glucose had the highest score compared to  
 256 another other metabolites (Fig. 6A). In order to determine if additional metabolites are  
 257 positively associated with changes in glucose, lactate and fructose, we performed a pattern  
 258 hunter analysis for all metabolites. We found that high glucose levels correlated with high  
 259 formate, acetate and glutamate and low lactate and fructose (Fig. 6b), indicating enhanced  
 260 glycolysis and TCA cycle in PBMCs. Similarly, fructose, that is entered *via* fructose-1-  
 261 phosphate and dihydroxy acetone phosphate (DAP) into the glycolysis, is correlated positively  
 262 with lactate and citrate and a decrease in acetate and formate, respectively (Fig. 6b).  
 263 Interestingly, levels of the ROS scavenger taurine are only positively correlated with lactate  
 264 and fructose, but not glucose (Fig. 6).

265

266 **Table 1: Summary of metabolites dysregulated in PBMCs**

267

| No | Metabolites | HC | Mild | Moderate | Convalescent |
|----|-------------|----|------|----------|--------------|
| 1  | Glucose     | ↑↑ | ↓↓   | ↓↓       | ↑↑           |
| 2  | Formate     | ↑↑ | ↓↓↓  | ↓↓       | ↑↑           |
| 3  | Acetate     | ↑  | ↓↓   | ↓        | ↑            |
| 4  | Lactate     | ↓↓ | ↑↑   | ↑↑       | ↓↓           |
| 5  | Fructose    | ↓  | ↑↑   | ↑        | ↓            |
| 6  | Glutamate   | ↑  | ↓    | ↓        | ↑            |
| 7  | Citrate     | ↓  | ↑↑   | ↑        | ↓            |
| 8  | Taurine     | ↓↓ | -    | ↑↑       | ↓            |
| 9  | Creatine    | ↓  | ↑    | -        | -            |
| 10 | Alanine     | ↓  | -    | ↑↑       | ↓            |
| 11 | Glycine     | ↑  | ↓    | ↓        | -            |
| 12 | Isoleucine  | -  | ↓↓   | ↓        | ↑            |

268

269 To find an association between different metabolites, we applied the variable importance of  
 270 projection (VIP) score. We found that formate and glucose had the highest score compared to  
 271 other metabolites (Fig. 6A). In order to determine if additional metabolites are positively  
 272 associated with changes in glucose, lactate and fructose, we performed a pattern hunter  
 273 analysis for all metabolites. We found that high glucose levels correlated with high formate,



274 acetate and glutamate and low lactate and fructose (Fig. 6b), indicating enhanced glycolysis  
275 and TCA cycle in PBMCs. Similarly, fructose, that is entered *via* fructose-1-phosphate and  
276 dihydroxy acetone phosphate (DAP) into the glycolysis, is correlated positively with lactate  
277 and citrate and a decrease in acetate and formate, respectively (Fig. 6b). Interestingly, levels  
278 of the ROS scavenger taurine are only positively correlated with lactate and fructose, but not  
279 glucose (Fig. 6).

280

## 281 **Discussion:**

282

283 SARS-CoV-2 infections are an intense and rapidly evolving area of research due to the  
284 ongoing global pandemic<sup>19,25</sup>. In this study, we used flow cytometry and <sup>1</sup>H-NMR to decipher  
285 the cell proportions and functional state of immune cells (PBMCs) in mild, moderate and  
286 convalescent COVID-19 patients compared to HC. Recent reports from COVID-19 patients  
287 suggested that mild and severe patient had lymphopenia<sup>11,45-47</sup>. Here, we found that mild  
288 patients have reduced lymphocyte numbers whereas convalescent patients have recovered  
289 the total lymphocyte counts. Similarly, monocytes were also reduced in mild patients, which is  
290 in agreement with other recent studies<sup>29,48,49</sup>. Importantly, our characterization of myeloid cell  
291 compartment based on CD16 and CD14 markers suggested that non-classical and  
292 intermediate monocytes were increased during an active mild or moderate SARS-CoV-2  
293 infection, once infections are cleared the monocyte numbers return to normal. These results  
294 are in accordance with some of the recent published studies<sup>48,50,51</sup>, while another study  
295 suggested the opposite<sup>52</sup>.

296

297 In our cohort, specifically CD56<sup>+</sup>NK cells were dramatically decreased during the course of  
298 active SARS-CoV-2 viral infections (mild and moderate), while during recovery the numbers  
299 were comparable to HC as report by others<sup>53</sup>. Similarly another recent study suggested the  
300 decrease in number of NK cell subsets in COVID-19 patients, with no change in CD56<sup>bright</sup> or  
301 CD56<sup>dim</sup> cells<sup>54</sup>. Thus, these data point to a crucial role of CD56<sup>+</sup>NK cells in eliminating SARS-  
302 CoV-2 infections<sup>47</sup>. CD19<sup>+</sup> B lymphocytes were increased during the course of infection and  
303 remain slightly higher than HC, thus reflecting the antibody response against the COVID-19  
304 virus. Thus, this data implicated that these patients were able to generate the SARS-CoV-2  
305 specific B cells.

306

307 A major difference was found in the T lymphocytes compartment. On the one hand, CD4<sup>+</sup> T  
308 cells were increased during infection, but not dramatically. On the other hand, CD8<sup>+</sup> T cells  
309 were significantly decreased in moderate and convalescent patients as reported earlier<sup>53</sup>.  
310 Thus, it appears that during viral infection non-virus specific CD8<sup>+</sup> T cells are dead, while the  
311 viral-specific surviving CD8<sup>+</sup> T cells are clonally expanded but appeared to lost their effector  
312 functions<sup>55</sup>. To confirm this, we first measured the activation status of CD8<sup>+</sup> T cells and found  
313 that CD8<sup>+</sup> T appeared to be less activated based on their HLA-DR activation marker<sup>26</sup>. Further,  
314 CD8<sup>+</sup> T cells were examined for another activation marker CD38 which is involved in cell  
315 adhesion, signal transduction and calcium signalling<sup>56</sup> and was found to be upregulated in  
316 convalescent patients but not during active infection. These CD38<sup>+</sup>CD8<sup>+</sup> T cells, were also  
317 expressing higher levels of PD-1, which is an immune checkpoint and marker of  
318 exhaustion<sup>24,30,49,57,58</sup>. It guards against autoimmunity, promotes apoptosis of antigen-specific  
319 T cells and promotes self-tolerance by suppressing T cell inflammatory activity. Thus, viral  
320 infection leaves convalescent patients with exhausted phenotypes. We found that although  
321 there was not a significant change in the numbers of Tregs in COVID-19 patients, there was

322 a trend towards elevated levels of Tregs in COVID-19 patients and rescued Tregs in  
323 convalescent patients, in agreement with previous studies<sup>57</sup>.

324

325 A key finding of our study was the surprising observation that granzyme B and perforin  
326 secreting CD8<sup>+</sup> T cells were significantly reduced in convalescent patients. The possible  
327 implication of our finding is that convalescent patients, specifically including cancer patients  
328 under treatment, could be susceptible to future opportunistic infections with other viruses  
329 including different strains of SARS-CoV-2.

330

331 To date, the general metabolic physiology of PBMCs is not well defined in literature. However,  
332 it is clear that PBMCs are dependent on circulating nutrients and hormones in the blood  
333 system<sup>59</sup>. The defective immune response in COVID-19 patients prompted us to investigate  
334 the metabolic functions of these immune cells. Our metabolomics data indeed shows that  
335 PBMCs from actively infected patients have a distinct metabolic profile from convalescent or  
336 healthy individuals. The most notable difference we observed were for metabolites from the  
337 glycolysis and oxidative phosphorylation (TCA cycle) pathway, which is in accordance with  
338 recently published transcriptome data for PBMCs<sup>39,43</sup>. Metabolites such as glucose, formate,  
339 acetate and choline were also reduced in PBMCs in infected patients whereas, HC and  
340 convalescent patients had a normal profile. Accordingly, the glycolytic pathway end products  
341 such as lactate were higher in active mild and moderate COVID-19 patients compared with  
342 HC and convalescent individuals. Therefore, our data suggests that PBMCs (which constitute  
343 a major fraction of T lymphoid cells: 70- 80%) may have changed their metabolic functions,  
344 particularly favouring the oxidative phosphorylation pathway over the glycolytic pathway, to  
345 meet the high demands of energy needed to combat the ongoing viral infection.

346

347 A recent report suggested that elevated glucose levels enhance SARS-CoV-2 replication and  
348 cytokine expression in monocytes and glycolysis sustains the viral-induced monocyte  
349 response<sup>60</sup>. Recently, it was emphasized that glucose consumption in PBMCs during COVID-  
350 19 disease could be also a read-out of cytokine storms<sup>34</sup>. Further, a higher abundance of  
351 citrate in PBMCs suggested that perhaps T cells could use the oxidative phosphorylation  
352 pathway for energy consumption to endure the infection, as recent transcriptomic data also  
353 suggested that higher expression of genes related to oxidative phosphorylation both in  
354 peripheral mononuclear leukocytes and bronchoalveolar lavage fluid (BALF) could play a  
355 crucial role in increased mitochondrial activity during SARS-CoV-2 infection<sup>34</sup>.

356

357 Another interesting finding of our study was the increase of fructose levels in PBMCs during  
358 the course of infection. Previous findings suggested that fructose is involved in the  
359 inflammatory pathways for the production of IL-1 $\beta$  and IL-6 production<sup>61</sup>. Thus, it is possible  
360 that the immune cells (most probably monocytes) could be triggered by higher fructose and  
361 simultaneously induce inflammation and IFN- $\gamma$  production by T cells<sup>61</sup>. These findings are  
362 correlating with recent transcriptomic studies on the BALF from infected COVID-19 patients  
363 and plasma of COVID-19 patients that also identified changes in fructose metabolism<sup>34,62</sup>.

364

365 We finally observed a reduction of granzyme B and perforin in CD8<sup>+</sup> T cells and detected the  
366 antioxidant amino acid taurine, which could be involved in the cytotoxic functions of CD8<sup>+</sup> T  
367 cells. Both granzyme B and perforin are involved in ROS production and taurine serves as  
368 ROS scavenger<sup>63,64</sup>. Thus, decreased granzyme B and perforin could be implicated in reduced  
369 ROS production for the impaired effectiveness of CD8<sup>+</sup> T cells in convalescent or COVID-19



370 patients. This should be the case, as taurine levels that are generally increased during an  
371 active infection in mild patients compared to healthy controls are not specifically decreasing  
372 due to granzyme B and perforin lacking ROS activity in COVID-19 patients. However, this  
373 finding needs further investigation to validate this hypothesis. In summary, the metabolomics  
374 data generated in this study provides first and crucial insights into the complex metabolic  
375 changes of PBMCs during SARS-CoV-2 infections, warranting further investigation.

376

### 377 **Conclusions:**

378 Using immunophenotyping and metabolomics approaches we detected significant changes in  
379 PBMC samples of mildly and moderately affected COVID-19 as well as convalescent patients  
380 compared to healthy controls. The significantly reduced amount of NK cells in both mild and  
381 moderate patient groups corresponded with the clustering of PBMCs metabolite levels in the  
382 principal component analysis distinct from the cluster formed by healthy and convalescent  
383 individuals. The dramatic changed metabolic activity and pathways, such as glycolysis and  
384 TCA cycle, might not only lead to a vulnerability of COVID-19 patients to subsequent  
385 infections, but can also offer insights into how PBMCs could be manipulated towards a better  
386 survival and personalized treatment of moderate and severe COVID-19 patients.

387

### 388 **Materials and Methods:**

389

#### 390 **Ethics statement**

391 The study protocols were approved by the University of Tübingen, Germany Human Research  
392 Ethics Committee (TÜCOV: 256/2020BO2 (convalescent study), COMIHY: (225/2020AMG1)  
393 (outpatient study)-COMIHY, EUDRA-CT: 2020-001512-26, ClinicalTrials.gov  
394 ID: NCT04340544, and COV-HCQ: (190//2020AMG1) (inpatient study)-COV-HCQ, EUDRA-  
395 CT: 2020-001224-33, ClinicalTrials.gov ID: NCT04342221, 556/2018BO2) and all associated  
396 procedures were carried out in accordance with approval guidelines. All participants provided  
397 written informed consent in accordance with the Declaration of Helsinki.

398

#### 399 **Study participants**

400

401 SARS-CoV-2 positive patients were used for this study and no other virus species were  
402 analysed in this study (COMIHY and COV-HCQ). Blood was collected from COVID-19 patients  
403 enrolled into two different prospective randomized, placebo-controlled, double blind clinical  
404 trials evaluating safety and efficacy of hydroxychloroquine in COVID-19 outpatients  
405 (COMIHY) and hospitalized patients (COV-HCQ). We analysed subsets of these study cohort  
406 and used outpatient (n=3; COMIHY) which came to a specified outpatient ward at in the  
407 Institute of Tropical Medicine with mild symptoms and blood was taken and usually defined as  
408 D1 outpatients. Inpatients (n=3; COV-HCQ), blood was taken after 7-9 days after study  
409 inclusion defined as D7. These patients had moderate symptoms needing hospital care,  
410 however not being transferred to the intensive care unit in the hospital. Furthermore,  
411 convalescent COVID-19 patients (n=4) were defined as positive for serum antibody reactive  
412 to SARS-CoV-2 and blood was taken when they visited the Institute of Tropical Medicine for  
413 testing of antibody levels. Amongst this cohort, 3 persons reported mild fever for 10-11 days  
414 and 1 individual reported no fever but found positive for SARS-CoV-2 antibodies. Blood from  
415 healthy controls (n=5) was obtained from the hospital blood bank.

416

417

418

419 **Table 2: Overview of study participants**  
420

| No | COVID-19 status         | Blood sampling | COVID-19 severity  | Sex | Age |
|----|-------------------------|----------------|--------------------|-----|-----|
| 1  | Outpatient (mild)       | Day1           | mild               | F   | 21  |
| 2  | Outpatient (mild)       | Day1           | mild               | M   | 59  |
| 3  | Outpatient (mild)       | Day1           | mild               | F   | 40  |
| 4  | Inpatient (moderate)    | Day7           | Moderate           | M   | 57  |
| 5  | Inpatient (moderate)    | Day7           | Moderate           | M   | 47  |
| 6  | Inpatient (moderate)    | Day7           | Moderate           | F   | 78  |
| 7  | Convalescent (Sero +ve) | Convalescent   | Recovered, healthy | F   | 50  |
| 8  | Convalescent (Sero +ve) | Convalescent   | Recovered, healthy | F   | 24  |
| 9  | Convalescent (Sero +ve) | Convalescent   | Recovered, healthy | M   | 50  |
| 10 | Convalescent (Sero +ve) | Convalescent   | Recovered, healthy | F   | 51  |
| 11 | HC1                     | -              | None               | F   | 36  |
| 12 | HC2                     | -              | None               | M   | 60  |
| 13 | HC3                     | -              | None               | M   | 40  |
| 14 | HC4                     | -              | None               | M   | 37  |
| 15 | HC5                     | -              | None               | M   | 47  |

421  
422 **Flow cytometry**

423  
424 PBMCs were isolated by standard Ficoll method<sup>65</sup>. A total of  $1-2 \times 10^6$  PBMCs per participants  
425 were used for three FACS panels (Table 2). In brief, cells were stained with surface markers  
426 in DPBS (Sigma) with Super Bright stain Buffer (ThermoFisher) for 30 minutes at room  
427 temperature (RT). To distinguish between live from dead, the cells were also incubated with  
428 LIVE/DEAD Fixable Infra-Red Dead stain (ThermoFisher). After surface staining cells were  
429 also stained for intracellular (IC) markers. Before IC staining, cells were fixed for 30-45 minutes  
430 and permeabilized for 5 minutes followed by IC antibody incubation for additional 30 minutes  
431 at RT. Cells were washed and resuspended in DPBS containing 2%FBS. Fixing of cells was  
432 performed irrespective of whether panel was used for IC staining or not to prevent the possible  
433 contamination during acquisition of the samples. For each sample 200,000 cells were acquired  
434 using BD LSRFortessa (core facility) equipped with 4 lasers (violet, blue and yellow-green and  
435 Red). Data were analysed using Flow Jo (Tree Star) and fluorescence minus one controls  
436 (FMO) were used for setting up the arbitrary gates for the major cell markers.

437  
438  
439  
440

441  
442

**Table 2: Antibodies and other reagents used for Flow cytometry**

| No. | Product Name  | Clone                                                                                              | Fluorochrome     | Product ID | Company      |
|-----|---------------|----------------------------------------------------------------------------------------------------|------------------|------------|--------------|
|     |               | <b>NK cells and Monocytes (Panel 1)</b>                                                            |                  |            |              |
| 1   | CD3           | UCHT1                                                                                              | eFluor 450       | 48-0038-42 | Thermofisher |
| 2   | CD4           | SK3                                                                                                | SuperBright 600  | 63-0047-42 | Thermofisher |
| 3   | CD8a          | SK1                                                                                                | PerCP-eFluor 710 | 46-0087-42 | Thermofisher |
| 4   | CD19          | HIB19                                                                                              | eFluor 506       | 69-0199-42 | Thermofisher |
| 5   | CD45-RA       | HI100                                                                                              | PE-Cy7           | 25-0458-42 | Thermofisher |
| 6   | HLA-DR        | L243                                                                                               | Alexa Fluor647   | A51010     | Thermofisher |
| 7   | CD38          | HIT2                                                                                               | PE-eFluor610     | 61-0389-42 | Thermofisher |
| 8   | CD56          | MEM188                                                                                             | PE               | MA119638   | Thermofisher |
| 9   | CD16          | 3G8                                                                                                | Super Bright702  | 67-0166-42 | Thermofisher |
| 10  | CD14          | 61D3                                                                                               | Alexa Fluor700   | 56-0149-42 | Thermofisher |
| 11  | Foxp3 (IC)    | PCH101                                                                                             | FITC             | 11-4776-42 | Thermofisher |
|     |               | <b>CD8 exhaustion, T helper follicular cells (Tfh) and antibody secreting cell (ASC) (Panel 2)</b> |                  |            |              |
| 1   | CD3           | UCHT1                                                                                              | eFluor 450       | 48-0038-42 | Thermofisher |
| 2   | CD19          | HIB19                                                                                              | eFluor 506       | 69-0199-42 | Thermofisher |
| 3   | CD4           | SK3                                                                                                | Super Bright 600 | 63-0047-42 | Thermofisher |
| 4   | CD8a          | SK1                                                                                                | PerCP-eFluor 710 | 46-0087-42 | Thermofisher |
| 5   | CD38          | HIT2                                                                                               | PE-eFluor 610    | 61-0389-42 | Thermofisher |
| 6   | CD27          | O323                                                                                               | Alexa Fluor700   | 56-0279-42 | Thermofisher |
| 7   | CXCR5 (CD185) | MU5UBE E                                                                                           | FITC             | 11-9185-42 | Thermofisher |
| 8   | ICOS (CD278)  | C398.4A                                                                                            | PE               | 12-9949-81 | Thermofisher |
| 9   | PD-1 (CD279)  | eBioJ105 (J105)                                                                                    | PE-Cy7           | 25-2799-42 | Thermofisher |
| 10  | HLA-DR        | L243                                                                                               | Alexa Fluor647   | A51010     | Thermofisher |
|     |               | <b>Cytotoxic potential</b>                                                                         |                  |            |              |
| 1   | CD4           | SK3                                                                                                | SuperBright600   | 63-0047-42 | Thermofisher |
| 2   | CD8           | SK1                                                                                                | PerCP-eFluor710  | 46-0087-42 | Thermofisher |
| 3   | CD19          | HIB19                                                                                              | eFluor 506       | 69-0199-42 | Thermofisher |
| 4   | CD38          | HIT2                                                                                               | PE-eFluor 610    | 61-0389-42 | Thermofisher |
| 5   | HLA-DR        | L243                                                                                               | Alexa Fluor 647  | A51010     | Thermofisher |

|   |                                   |                            |                 |            |              |
|---|-----------------------------------|----------------------------|-----------------|------------|--------------|
| 6 | GZMA (IC)                         | CB9                        | Alexa Fluor 488 |            | Thermofisher |
| 7 | GZMB (IC)                         | GB11                       | PE              | MA523639   | Thermofisher |
| 8 | Perforin (IC)                     | dG9                        | PE-Cy7          | 12-9177-42 | Thermofisher |
|   |                                   | <b>Other Flow reagents</b> |                 |            |              |
| 1 | Ultracompensation bead            |                            |                 | 01-2222-42 | Thermofisher |
| 2 | FOXP3/TRN FACTOR STAIN BUFFER SET |                            |                 | 00-5523-00 | Thermofisher |
| 3 | FLOW STAIN BUFFER SOLN            |                            |                 | 00-4222-57 | Thermofisher |
| 4 | SB COMPLETE STAINING BUFFER       |                            |                 | SB-4401-42 | Thermofisher |
| 5 | DPBS                              |                            |                 | D8537      | Sigma        |
| 6 | Pancoll human                     |                            |                 | P04-601000 | Pan Biotech  |

443

#### 444 **<sup>1</sup>H-NMR metabolomics**

445

446 To obtain PBMCs metabolites, PBMCs were suspended in an optimized solvent extraction  
 447 mixture of 9:1 (methanol:chloroform) as described elsewhere in detail<sup>66</sup> and extracted with a  
 448 focused ultrasound system (Covaris E220, Woburn, USA). The extraction solutions were  
 449 evaporated to dryness for 4 hours in a vacuum concentrator and afterwards pellets  
 450 resuspended with 45  $\mu$ L in a 1 mM TSP containing deuterated phosphate buffer. After  
 451 centrifugation at 20,000 x g for 10 min to remove residual macromolecules, 40  $\mu$ L of the clear  
 452 supernatant were transferred to 1.7 mm NMR tubes. Spectra were recorded on an  
 453 ultrashielded 600 MHz spectrometer (Bruker AVANCE III HD, Karlsruhe, Germany) with a  
 454 triple resonance 1.7 mm room temperature probe. Spectra used for analysis were acquired  
 455 with a 2h 55min lasting CPMG pulse program. Metabolite annotation and quantification was  
 456 done with ChenomX NMR Suite 8.3.

457

#### 458 **Statistical analysis**

459

460 Bar diagrams were prepared using GraphPad Prism 6.0. FACS data were analysed using one-  
 461 way ANOVA for multiple group comparisons (mild, moderate, convalescent and HC) in  
 462 GraphPad Prism software. No matching or pairing was used. Assumed Gaussian distribution  
 463 with equal standard deviations (SDs) for experimental design. Mean of each group was  
 464 compared with the mean of every other group and Tukey's post-hoc tests for multiple  
 465 comparisons. P value considered significant less than 0.05. Metabolites data were analysed  
 466 with MetaboAnalyst 4.0 software.

467

468

469

470

471

472

473

474 **Figure legends:**

475

476 **Fig. 1:** Comparison of monocytes and NK cell percentage amongst study groups.

477

478 A. The stained PBMCs were gated on the monocyte population and CD3+CD19+ cells  
479 were excluded. Cell populations are displayed for CD16 and CD14 expression (upper  
480 FACS panel). One exemplary dot plot is shown per study group. The bar diagrams  
481 (lower panel) show the non-classical (CD16<sup>++</sup>CD14<sup>+</sup>), intermediate (CD16<sup>++</sup>CD14<sup>++</sup>)  
482 and classical (CD16<sup>-</sup>CD14<sup>++</sup>) monocytes. \*P value <0.05, \*\*P value <0.01 and \*\*\*P  
483 value <0.001.

484 B. The stained PBMCs were gated on lymphocyte population and further excluded the  
485 CD3+CD19+ cells and examined for the CD56 and CD16 expression in HC, mild,  
486 moderate and convalescent (upper FACS panel). One exemplary dot plot is shown per  
487 study group. The bar diagram shows the CD56<sup>+</sup>CD3<sup>-</sup>CD19<sup>-</sup> NK cells. \*\*P value <0.01  
488 and \*\*\*\*P value <0.0001.

489

490 **Fig. 2:** Increased B cells in mild and moderate patients and reduced CD8<sup>+</sup> cytotoxic T cells in  
491 mild and convalescent patients

492

493 A. The stained PBMCs were gated on lymphocyte population and examined for the CD19  
494 and CD3 expression in HC, mild, moderate and convalescent (upper FACS panel).  
495 One exemplary dot plot is shown per study group. The bar diagram shows CD3<sup>-</sup>CD19<sup>+</sup>  
496 B cells. \*P value <0.05, \*\*P value <0.01 and \*\*\*P value <0.001.

497 B. The CD19<sup>-</sup>CD3<sup>+</sup> lymphocytes were examined for CD4<sup>+</sup> and CD8<sup>+</sup> T marker expression.  
498 One exemplary dot plot is shown per study group. There was statistically significant  
499 difference among HC, mild, moderate and convalescent (upper FACS panel).  
500 However, CD8<sup>+</sup> T cells were significantly reduced in outpatient and convalescent  
501 patients. \*P value <0.05.

502

503 **Fig. 3:** Decreased activation and cytotoxic functional protein expression of CD8<sup>+</sup> T cells in  
504 convalescent patients

505

506 A. CD8<sup>+</sup> T cells were examined for the expression of activation marker HLA-DR (upper  
507 FACS panel). One exemplary dot plot is shown per study group. The bar diagram  
508 (lower panel) shows that HLA-DR was significantly lower on CD8<sup>+</sup> T cells in mild,  
509 moderate and convalescent COVID-19+ patients compared with HC.

510 B. CD8<sup>+</sup> T cells were examined for the expression of their cytotoxic potential using  
511 granzyme B and perforin expression using IC staining (upper FACS panel). One  
512 exemplary dot plot is shown per study group. There was statistically significant  
513 difference among HC, mild, moderate and convalescent (upper FACS panel) for  
514 granzyme B. The bar diagram (lower panel) shows that perforin expression was  
515 significantly lower on CD8<sup>+</sup> T cells in convalescent COVID-19+ patients compared with  
516 HC, though mild and moderate represent lower expression of perforin, but it did not to  
517 a significant level. \*P value <0.05.

518

519 **Fig. 4:** Increased exhausted CD8<sup>+</sup> T cells in convalescent patients

520



- 521 A. Expression of activation marker CD38 on CD8<sup>+</sup> T cells (upper FACS panel). One  
522 exemplary dot plot is shown per study group. The bar diagram (lower panel) shows  
523 that CD38 expression was significantly higher on CD8<sup>+</sup> T cells in convalescent COVID-  
524 19+ patients compared with HC. \*P value <0.05.  
525
- 526 B. Expression of activation marker CD38 and PD-1 on CD8<sup>+</sup> T cells (upper FACS panel).  
527 One exemplary dot plot is shown per study group. The bar diagram (lower panel)  
528 shows that PD-1<sup>+</sup>CD38<sup>+</sup> expression on was significantly higher on CD8<sup>+</sup> T cells in  
529 convalescent COVID-19+ patients compared with HC. \*P value <0.05, \*\*P value <0.01.  
530

531 **Fig. 5:** <sup>1</sup>H-NMR spectroscopy of PBMC extracts

- 532 A. Heatmap of featured metabolites' concentrations plotted with SARS-CoV-2  
533 progression group clustering.  
534 B. Principle component analysis (PCA) was performed to identify the clustering of two  
535 different groups. HC and convalescent COVID-19 patient samples cluster together  
536 while SARS-Co-2 infected mild and moderate patients cluster in a separate cluster with  
537 PC1: 90.7% and PC2: 2.6%.  
538 C. Box plots for differentially abundantly present metabolites in different group including  
539 HC, mild, moderate, and convalescent COVID-19 patient. \*P value <0.05, \*\*P value  
540 <0.01 and \*\*\*P value <0.001.  
541

542 **Fig. 6:** Pattern hunter plots provide an insight of close correlations with other metabolites  
543 during COVID-19 infection.

- 544 A. Variable Importance in Projection (VIP) scores for all metabolites in the four studied  
545 groups.  
546 B. Pattern hunter plot for glucose.  
547 C. Pattern hunter plot for lactate and fructose.  
548

549 **Suppl. Fig. 1:** Total % counts of monocytes and lymphocytes from PBMCs of COVID-19  
550 patients.

- 551 A. Fixed PBMCs samples were acquired on flow cytometry on 2-3 different days for the  
552 entire experiments. Total 200,000 cells were acquired by flow cytometry and gating  
553 was performed based on FSC and SSC parameters for lymphocytes, monocytes and  
554 dead cells as described earlier<sup>67-69</sup>.  
555 B. The bar graphs represent the % of lymphocytes and monocytes.  
556 C. Gating strategy for T lymphocytes (CD3, CD4 and CD8) monocytes (CD14 and  
557 CD16)<sup>44</sup>, NK cells (CD56) using FMO controls.  
558

559 **Suppl. Fig. 2:** Kinetics of regulatory T cells is not affected significantly in mild, moderate and  
560 convalescent patients.

- 561  
562 Foxp3<sup>+</sup> expression on CD19<sup>-</sup>CD3<sup>+</sup>CD4<sup>+</sup>CD45RA<sup>-</sup> T cells to identify the regulatory T cells in  
563 HC, outpatient, outpatient and convalescent (upper FACS panel). There was statistically  
564 significant difference among HC, mild, moderate and convalescent (upper FACS panel).  
565

566 **Suppl. Fig. 3:** Metabolite analysis in COVID-19 patients

- 567 A. Analysis of Variance (ANOVA) for multi-group comparisons  
568 B. Partial Least Squares Discriminant Analysis (PLSDA) scores plot

569 C. Hierarchical clustering of metabolites (distance measured with Pearson r correlation  
570 coefficient)

571 D. Boxplots for branched chain amino acids valine and leucine

572

### 573 **Authors contributions:**

574

575 YS: Overall study design and project coordination, flow cytometry experiments, data analysis  
576 and interpretation and initial metabolic sample preparation, funding generation, and writing the  
577 manuscript.

578 CT: Metabolites sample preparation, Processing of the sample on <sup>1</sup>H-NMR, data analysis,  
579 data interpretation and writing

580 MO: Metabolites sample preparation, Processing of the sample on <sup>1</sup>H-NMR

581 RF, NK: Provided patient materials, Isolation of PBMCs, Performed the experiments for  
582 flowcytometry in BSL-2 facility, flow data interpretations.

583 JH, AK: Coordination of the clinical trials, revision of the manuscript.

584 RB: Isolation of PBMCs from HC and sample preparation for flow cytometry.

585 SO, MS, NC, OR: Study design, providing research tools, funding generation, data  
586 interpretation and writing and amending the manuscript.

587

588 All the authors have seen the manuscript, substantially contributed and agreed to be co-  
589 author.

590

### 591 **Acknowledgements:**

592

593 We thank you all the patients who participated in this study and FACS core facility (Klinikum-  
594 Berg) for accessing the Flow cytometry for the experiments. We acknowledge support by  
595 Deutsche Forschungsgemeinschaft (DFG) and Open Access Publishing Fund of University of  
596 Tübingen.

597

### 598 **Funding:**

599

600 RB is supported by Deutsche Forschungsgemeinschaft (DFG Project no. 426724658). EKFS  
601 (MS), DFG (OR), Ferring Pharmaceutical (YS and MS). Funders have no role in the study  
602 design and data analysis. The German Federal Ministry of Education and Research (BMBF)  
603 (BMBF-01KI2052) and the German Federal Ministry of Health (BMG) (BMG-ZMV11-  
604 1520COR801).

605

### 606 **Competing interests:**

607

608 Authors declare no financial competing interests.

609

### 610 **Consortia**

611 The members of the Deutsche COVID-19 Omics Initiative (DeCOI) are Angel Angelov, Robert  
612 Bals, Alexander Bartholomäus, Anke Becker, Daniela Bezdán, Ezio Bonifacio, Peer Bork,  
613 Nicolas Casadei, Thomas Clavel, Maria Colome-Tatche, Andreas Diefenbach, Alexander  
614 Diltthey, Nicole Fischer, Konrad Förstner, Julia-Stefanie Frick, Julien Gagneur, Alexander  
615 Goemann, Torsten Hain, Michael Hummel, Stefan Janssen, Jörn Kalinowski, René Kallies,  
616 Birte Kehr, Andreas Keller, Sarah Kim-Hellmuth, Christoph Klein, Oliver Kohlbacher, Jan O.

617 Korbel, Ingo Kurth, Markus Landthaler, Yang Li, Kerstin Ludwig, Oliwia Makarewicz, Manja  
618 Marz, Alice McHardy, Christian Mertes, Markus Nöthen, Peter Nürnberg, Uwe Ohler, Stephan  
619 Ossowski, Jörg Overmann, Silke Peter, Klaus Pfeffer, Anna R. Poetsch, Alfred Pühler,  
620 Nikolaus Rajewsky, Markus Ralser, Olaf Rieß, Stephan Ripke, Ulisses Nunes da Rocha, Philip  
621 Rosenstiel, Antoine-Emmanuel Saliba, Leif Erik Sander, Birgit Sawitzki, Philipp Schiffer, Eva-  
622 Christina Schulte, Joachim L. Schultze, Alexander Sczyrba, Yogesh Singh, Oliver Stegle, Jens  
623 Stoye, Fabian Theis, Janne Vehreschild, Jörg Vogel, Max von Kleist, Andreas Walker, Jörn  
624 Walter, Dagmar Wieczorek, and John Ziebuhr.

625

## 626 **References:**

627

- 628 1 Zhu, N. et al. A Novel Coronavirus from Patients with Pneumonia in China, 2019. *N*  
629 *Engl J Med* 382, 727-733, doi:10.1056/NEJMoa2001017 (2020).
- 630 2 Dashboard, J. C.-L. <https://coronavirus.jhu.edu/map.html>. (2020).
- 631 3 Dashboard, W. L. <https://covid19.who.int>. (2020).
- 632 4 Chang, L., Yan, Y. & Wang, L. Coronavirus Disease 2019: Coronaviruses and Blood  
633 Safety. *Transfus Med Rev*, doi:10.1016/j.tmr.2020.02.003 (2020).
- 634 5 Lehner, N. J. M. P. J. How does SARS-CoV-2 cause COVID-19? *Science*, 510-511  
635 (2020).
- 636 6 Liu, J. et al. Community Transmission of Severe Acute Respiratory Syndrome  
637 Coronavirus 2, Shenzhen, China, 2020. *Emerg Infect Dis* 26,  
638 doi:10.3201/eid2606.200239 (2020).
- 639 7 Singhal, T. A Review of Coronavirus Disease-2019 (COVID-19). *Indian J Pediatr* 87,  
640 281-286, doi:10.1007/s12098-020-03263-6 (2020).
- 641 8 WHO. <WHO-2019-nCoV-Sci\_Brief-Transmission\_modes-2020.3-eng.pdf>. WHO  
642 Report (2020).
- 643 9 Rothe, C. et al. Transmission of 2019-nCoV Infection from an Asymptomatic Contact  
644 in Germany. *N Engl J Med* 382, 970-971, doi:10.1056/NEJMc2001468 (2020).
- 645 10 Xu, Z. et al. Pathological findings of COVID-19 associated with acute respiratory  
646 distress syndrome. *The Lancet Respiratory Medicine* 8, 420-422, doi:10.1016/s2213-  
647 2600(20)30076-x (2020).
- 648 11 Wei Huang, J. B., Michelle McNamara, Suraj Saksena, Marsha Hartman, Tariq Arshad,  
649 Scott J. Bornheimer and Maurice O'Gorman. Lymphocyte Subset Counts in COVID-19  
650 Patients: A Meta-Analysis. doi:10.1002/cyto.24172 (2020).
- 651 12 Chen, G. et al. Clinical and immunological features of severe and moderate  
652 coronavirus disease 2019. *J Clin Invest* 130, 2620-2629, doi:10.1172/JCI137244  
653 (2020).
- 654 13 Shi, Y. et al. COVID-19 infection: the perspectives on immune responses. *Cell Death*  
655 *Differ*, doi:10.1038/s41418-020-0530-3 (2020).
- 656 14 NcA OANA dOcEA, A. T., DANA ALBULEScU, OANA CRISTEA, & OVIDIU ZLATIAN,  
657 M. V., STERGHIOS A. MOSCHOS, dIMITRIS TSOUKALAS, MARINA GOUMENOU,  
658 NIKOLAOS dRAKOULIS, JOSEF M. dUMANOV, VIcTOR A. TUTELYAN, GENNAdII  
659 G. ONISCHENKO, MIcHAEL ASCHNER, dEMETRIOS A. SPANdIdOS and dANIELA  
660 cALINA. A new threat from an old enemy: Re-emergence of coronavirus (Review).  
661 *INTERNATIONAL JOURNAL OF MOLEcULAR MEdIcINE* 45, 1631-1643 (2020).
- 662 15 Ong, E. Z. et al. A Dynamic Immune Response Shapes COVID-19 Progression. *Cell*  
663 *Host Microbe* 27, 879-882 e872, doi:10.1016/j.chom.2020.03.021 (2020).
- 664 16 Picchianti Diamanti, A., Rosado, M. M., Pioli, C., Sesti, G. & Lagana, B. Cytokine  
665 Release Syndrome in COVID-19 Patients, A New Scenario for an Old Concern: The  
666 Fragile Balance between Infections and Autoimmunity. *Int J Mol Sci* 21,  
667 doi:10.3390/ijms21093330 (2020).
- 668 17 Vabret, N. et al. Immunology of COVID-19: Current State of the Science. *Immunity* 52,  
669 910-941, doi:10.1016/j.immuni.2020.05.002 (2020).

- 670 18 Velavan, T. P. & Meyer, C. G. Mild versus severe COVID-19: Laboratory markers. *Int*  
671 *J Infect Dis* 95, 304-307, doi:10.1016/j.ijid.2020.04.061 (2020).
- 672 19 Daniela Weiskopf<sup>1</sup>, K. S. S., Matthijs P. Raadsen, Alba Grifoni, Nisreen M.A. Okba,  
673 Henrik Endeman, Johannes P.C. van den Akker, Richard Molenkamp, Marion P.G.  
674 Koopmans, Eric C.M. van Gorp, Bart L. Haagmans, Rik L. de Swart, Alessandro Sette,  
675 Rory D. de Vries. Phenotype and kinetics of SARS-CoV-2-specific T cells in COVID-  
676 19 patients with acute respiratory distress syndrome. *Science Immunology*,  
677 doi:10.1126/sciimmunol.abd2071 (2020). (2020).
- 678 20 Del Valle, D. M. et al. An inflammatory cytokine signature predicts COVID-19 severity  
679 and survival. *Nature Medicine*, doi:10.1038/s41591-020-1051-9 (2020).
- 680 21 Wu, H. et al. Clinical and Immune Features of Hospitalized Pediatric Patients With  
681 Coronavirus Disease 2019 (COVID-19) in Wuhan, China. *JAMA Netw Open* 3,  
682 e2010895, doi:10.1001/jamanetworkopen.2020.10895 (2020).
- 683 22 Du, S. Q. & Yuan, W. Mathematical modeling of interaction between innate and  
684 adaptive immune responses in COVID-19 and implications for viral pathogenesis. *J*  
685 *Med Virol*, doi:10.1002/jmv.25866 (2020).
- 686 23 Giamarellos-Bourboulis, E. J. et al. Complex Immune Dysregulation in COVID-19  
687 Patients with Severe Respiratory Failure. *Cell Host Microbe* 27, 992-1000 e1003,  
688 doi:10.1016/j.chom.2020.04.009 (2020).
- 689 24 Braciale, T. J. & Hahn, Y. S. Immunity to viruses. *Immunol Rev* 255, 5-12,  
690 doi:10.1111/imr.12109 (2013).
- 691 25 McKechnie, J. L. & Blish, C. A. The Innate Immune System: Fighting on the Front Lines  
692 or Fanning the Flames of COVID-19? *Cell Host Microbe* 27, 863-869,  
693 doi:10.1016/j.chom.2020.05.009 (2020).
- 694 26 Thevarajan, I. et al. Breadth of concomitant immune responses prior to patient  
695 recovery: a case report of non-severe COVID-19. *Nature Medicine*,  
696 doi:10.1038/s41591-020-0819-2 (2020).
- 697 27 Assis, R. R. d. et al. Analysis of SARS-CoV-2 Antibodies in COVID-19 Convalescent  
698 Plasma using a Coronavirus Antigen Microarray  
699 bioRxiv preprint doi: <https://doi.org/10.1101/2020.04.15.043364>,  
700 doi:10.1101/2020.04.15.043364 (2020).
- 701 28 Cao, Y. et al. Potent Neutralizing Antibodies against SARS-CoV-2 Identified by High-  
702 Throughput Single-Cell Sequencing of Convalescent Patients' B Cells. *Cell* 182, 73-84  
703 e16, doi:10.1016/j.cell.2020.05.025 (2020).
- 704 29 Qin, C. et al. Dysregulation of immune response in patients with COVID-19 in Wuhan,  
705 China. *Clin Infect Dis*, doi:10.1093/cid/ciaa248 (2020).
- 706 30 Song, J. W. et al. Immunological and inflammatory profiles in mild and severe cases  
707 of COVID-19. *Nat Commun* 11, 3410, doi:10.1038/s41467-020-17240-2 (2020).
- 708 31 Channappanavar, R., Fett, C., Zhao, J., Meyerholz, D. K. & Perlman, S. Virus-specific  
709 memory CD8 T cells provide substantial protection from lethal severe acute respiratory  
710 syndrome coronavirus infection. *J Virol* 88, 11034-11044, doi:10.1128/JVI.01505-14  
711 (2014).
- 712 32 Janice Oh, H. L., Ken-En Gan, S., Bertoletti, A. & Tan, Y. J. Understanding the T cell  
713 immune response in SARS coronavirus infection. *Emerg Microbes Infect* 1, e23,  
714 doi:10.1038/emi.2012.26 (2012).
- 715 33 Bost, P. et al. Host-Viral Infection Maps Reveal Signatures of Severe COVID-19  
716 Patients. *Cell*, doi:10.1016/j.cell.2020.05.006 (2020).
- 717 34 Gardinassi, L. G., Souza, C. O. S., Sales-Campos, H. & Fonseca, S. G. Immune and  
718 Metabolic Signatures of COVID-19 Revealed by Transcriptomics Data Reuse.  
719 *Frontiers in Immunology* 11, doi:10.3389/fimmu.2020.01636 (2020).
- 720 35 Ayres, J. S. Immunometabolism of infections. *Nat Rev Immunol* 20, 79-80,  
721 doi:10.1038/s41577-019-0266-9 (2020).
- 722 36 Thaker, S. K., Ch'ng, J. & Christofk, H. R. Viral hijacking of cellular metabolism. *BMC*  
723 *Biol* 17, 59, doi:10.1186/s12915-019-0678-9 (2019).



- 724 37 Moreno-Altamirano, M. M. B., Kolstoe, S. E. & Sanchez-Garcia, F. J. Virus Control of  
725 Cell Metabolism for Replication and Evasion of Host Immune Responses. *Front Cell*  
726 *Infect Microbiol* 9, 95, doi:10.3389/fcimb.2019.00095 (2019).
- 727 38 Gupta, S. S., Wang, J. & Chen, M. Metabolic Reprogramming in CD8+ T Cells During  
728 Acute Viral Infections. *Frontiers in Immunology* 11, doi:10.3389/fimmu.2020.01013  
729 (2020).
- 730 39 Shehata, H. M. et al. Sugar or Fat?-Metabolic Requirements for Immunity to Viral  
731 Infections. *Front Immunol* 8, 1311, doi:10.3389/fimmu.2017.01311 (2017).
- 732 40 Pallett, L. J., Schmidt, N. & Schurich, A. T cell metabolism in chronic viral infection.  
733 *Clin Exp Immunol* 197, 143-152, doi:10.1111/cei.13308 (2019).
- 734 41 Swamy, M. et al. Glucose and glutamine fuel protein O-GlcNAcylation to control T cell  
735 self-renewal and malignancy. *Nat Immunol* 17, 712-720, doi:10.1038/ni.3439 (2016).
- 736 42 Liew, C. C., Ma, J., Tang, H. C., Zheng, R. & Dempsey, A. A. The peripheral blood  
737 transcriptome dynamically reflects system wide biology: a potential diagnostic tool. *J*  
738 *Lab Clin Med* 147, 126-132, doi:10.1016/j.lab.2005.10.005 (2006).
- 739 43 Xiong, Y. et al. Transcriptomic characteristics of bronchoalveolar lavage fluid and  
740 peripheral blood mononuclear cells in COVID-19 patients. *Emerg Microbes Infect* 9,  
741 761-770, doi:10.1080/22221751.2020.1747363 (2020).
- 742 44 Wong, K. L. et al. The three human monocyte subsets: implications for health and  
743 disease. *Immunol Res* 53, 41-57, doi:10.1007/s12026-012-8297-3 (2012).
- 744 45 Liu, J. et al. Longitudinal characteristics of lymphocyte responses and cytokine profiles  
745 in the peripheral blood of SARS-CoV-2 infected patients. *EBioMedicine* 55, 102763,  
746 doi:10.1016/j.ebiom.2020.102763 (2020).
- 747 46 Wang, F. et al. Characteristics of peripheral lymphocyte subset alteration in COVID-  
748 19 pneumonia. *J Infect Dis*, doi:10.1093/infdis/jiaa150 (2020).
- 749 47 Wen, W. et al. Immune cell profiling of COVID-19 patients in the recovery stage by  
750 single-cell sequencing. *Cell Discov* 6, 31, doi:10.1038/s41421-020-0168-9 (2020).
- 751 48 Zhang, D. et al. COVID-19 infection induces readily detectable morphological and  
752 inflammation-related phenotypic changes in peripheral blood monocytes, the severity  
753 of which correlate with patient outcome. medRxiv preprint doi:  
754 <https://doi.org/10.1101/2020.03.24.20042655>. , doi:10.1101/2020.03.24.20042655  
755 (2020).
- 756 49 Zhou, R. et al. Acute SARS-CoV-2 Infection Impairs Dendritic Cell and T Cell  
757 Responses. *Immunity*, doi:10.1016/j.immuni.2020.07.026 (2020).
- 758 50 Silvin, A. et al. Elevated Calprotectin and Abnormal Myeloid Cell Subsets Discriminate  
759 Severe from Mild COVID-19. *Cell*, doi:10.1016/j.cell.2020.08.002 (2020).
- 760 51 Takahashi, T. et al. Sex differences in immune responses that underlie COVID-19  
761 disease outcomes. *Nature*, doi:10.1038/s41586-020-2700-3 (2020).
- 762 52 Schulte-Schrepping, J. et al. Severe COVID-19 Is Marked by a Dysregulated Myeloid  
763 Cell Compartment. *Cell*, doi:10.1016/j.cell.2020.08.001 (2020).
- 764 53 Jiang, Y. et al. COVID-19 pneumonia: CD8(+) T and NK cells are decreased in number  
765 but compensatory increased in cytotoxic potential. *Clin Immunol* 218, 108516,  
766 doi:10.1016/j.clim.2020.108516 (2020).
- 767 54 Christopher Maucourant, I. F., Andrea Ponzetta, Soo Aleman, Martin Cornillet, Laura  
768 Hertwig Benedikt Strunz, Antonio Lentini, Björn Reinius, Demi Brownlie, Angelica  
769 Cuapio Gomez, Eivind Heggernes Ask, Ryan M. Hull, Alvaro Haroun-Izquierdo, Marie  
770 Schaffer, Jonas Klingström, Elin Folkesson, Marcus Buggert, Johan K. Sandberg, Lars  
771 I. Eriksson, Olav Rooyackers, Hans-Gustaf Ljunggren, Karl-Johan Malmberg, Jakob  
772 Michaëlsson, Nicole Marquardt, Quirin Hammer, Kristoffer Strålin, Niklas K.  
773 Björkström; and the Karolinska COVID-19 Study Group. Natural killer cell  
774 immunotypes related to COVID-19 disease severity. *Science Immunology*,  
775 doi:10.1126/sciimmunol.abd6832 (2020). (2020).
- 776 55 Diao, B. et al. Reduction and Functional Exhaustion of T Cells in Patients With  
777 Coronavirus Disease 2019 (COVID-19). *Front Immunol* 11, 827,  
778 doi:10.3389/fimmu.2020.00827 (2020).



- 779 56 Katsuyama, E. et al. The CD38/NAD/SIRTUIN1/EZH2 Axis Mitigates Cytotoxic CD8 T  
780 Cell Function and Identifies Patients with SLE Prone to Infections. *Cell Rep* 30, 112-  
781 123 e114, doi:10.1016/j.celrep.2019.12.014 (2020).
- 782 57 Zheng, H. Y. et al. Elevated exhaustion levels and reduced functional diversity of T  
783 cells in peripheral blood may predict severe progression in COVID-19 patients. *Cell*  
784 *Mol Immunol*, doi:10.1038/s41423-020-0401-3 (2020).
- 785 58 De Biasi, S. et al. Marked T cell activation, senescence, exhaustion and skewing  
786 towards TH17 in patients with COVID-19 pneumonia. *Nat Commun* 11, 3434,  
787 doi:10.1038/s41467-020-17292-4 (2020).
- 788 59 Zeng, Y. et al. Peripheral Blood Mononuclear Cell Metabolism Acutely Adapted to  
789 Postprandial Transition and Mainly Reflected Metabolic Adipose Tissue Adaptations  
790 to a High-Fat Diet in Minipigs. *Nutrients* 10, doi:10.3390/nu10111816 (2018).
- 791 60 Codo, A. C. et al. Elevated Glucose Levels Favor SARS-CoV-2 Infection and Monocyte  
792 Response through a HIF-1alpha/Glycolysis-Dependent Axis. *Cell Metab*,  
793 doi:10.1016/j.cmet.2020.07.007 (2020).
- 794 61 Jaiswal, N., Agrawal, S. & Agrawal, A. High fructose-induced metabolic changes  
795 enhance inflammation in human dendritic cells. *Clin Exp Immunol* 197, 237-249,  
796 doi:10.1111/cei.13299 (2019).
- 797 62 Di Wu, T. S., Xiaobo Yang, Jian-Xin Song Mingliang Zhang Chengye Yao Wen Liu,  
798 Muhan Huang, Yuan Yu, Qingyu Yang Tingju Zhu, Jiqian Xu, Jingfang Mu, Yaxin  
799 Wang, Hong Wang, Tang Tang, Yujie Ren Yongran Wu, Shu-Hai Lin, Yang Qiu, Ding-  
800 Yu Zhang, You Shang, Xi Zhou. Plasma Metabolomic and Lipidomic Alterations  
801 Associated with COVID-19. *Natl Sci Rev*, doi:10.1093/nsr/nwaa086 (2020).
- 802 63 Max W. S. Oliveira, J. B. M., Marcos R. de Oliveira, Alfeu Zanotto-Filho, Guilherme A.  
803 Behr, Ricardo F. Rocha, José C. F. Moreira, Fábio Klamt. Scavenging and antioxidant  
804 potential of physiological taurine concentrations against different reactive  
805 oxygen/nitrogen species. *Pharmaceutical Reports* 62, 185-193 (2010).
- 806 64 Cunningham, L., Simmonds, P., Kimber, I., Basketter, D. A. & McFadden, J. P. Perforin  
807 and resistance to SARS coronavirus 2. *J Allergy Clin Immunol* 146, 52-53,  
808 doi:10.1016/j.jaci.2020.05.007 (2020).
- 809 65 Maskus, D. J. et al. Characterization of a novel inhibitory human monoclonal antibody  
810 directed against Plasmodium falciparum Apical Membrane Antigen 1. *Sci Rep* 6,  
811 39462, doi:10.1038/srep39462 (2016).
- 812 66 Lorenz, M. A., Burant, C. F. & Kennedy, R. T. Reducing time and increasing sensitivity  
813 in sample preparation for adherent mammalian cell metabolomics. *Anal Chem* 83,  
814 3406-3414, doi:10.1021/ac103313x (2011).
- 815 67 Marimuthu, R. et al. Characterization of Human Monocyte Subsets by Whole Blood  
816 Flow Cytometry Analysis. *J Vis Exp*, doi:10.3791/57941 (2018).
- 817 68 Autissier, P., Soulas, C., Burdo, T. H. & Williams, K. C. Evaluation of a 12-color flow  
818 cytometry panel to study lymphocyte, monocyte, and dendritic cell subsets in humans.  
819 *Cytometry A* 77, 410-419, doi:10.1002/cyto.a.20859 (2010).
- 820 69 Davies, R., Vogelsang, P., Jonsson, R. & Appel, S. An optimized multiplex flow  
821 cytometry protocol for the analysis of intracellular signaling in peripheral blood  
822 mononuclear cells. *J Immunol Methods* 436, 58-63, doi:10.1016/j.jim.2016.06.007  
823 (2016).
- 824

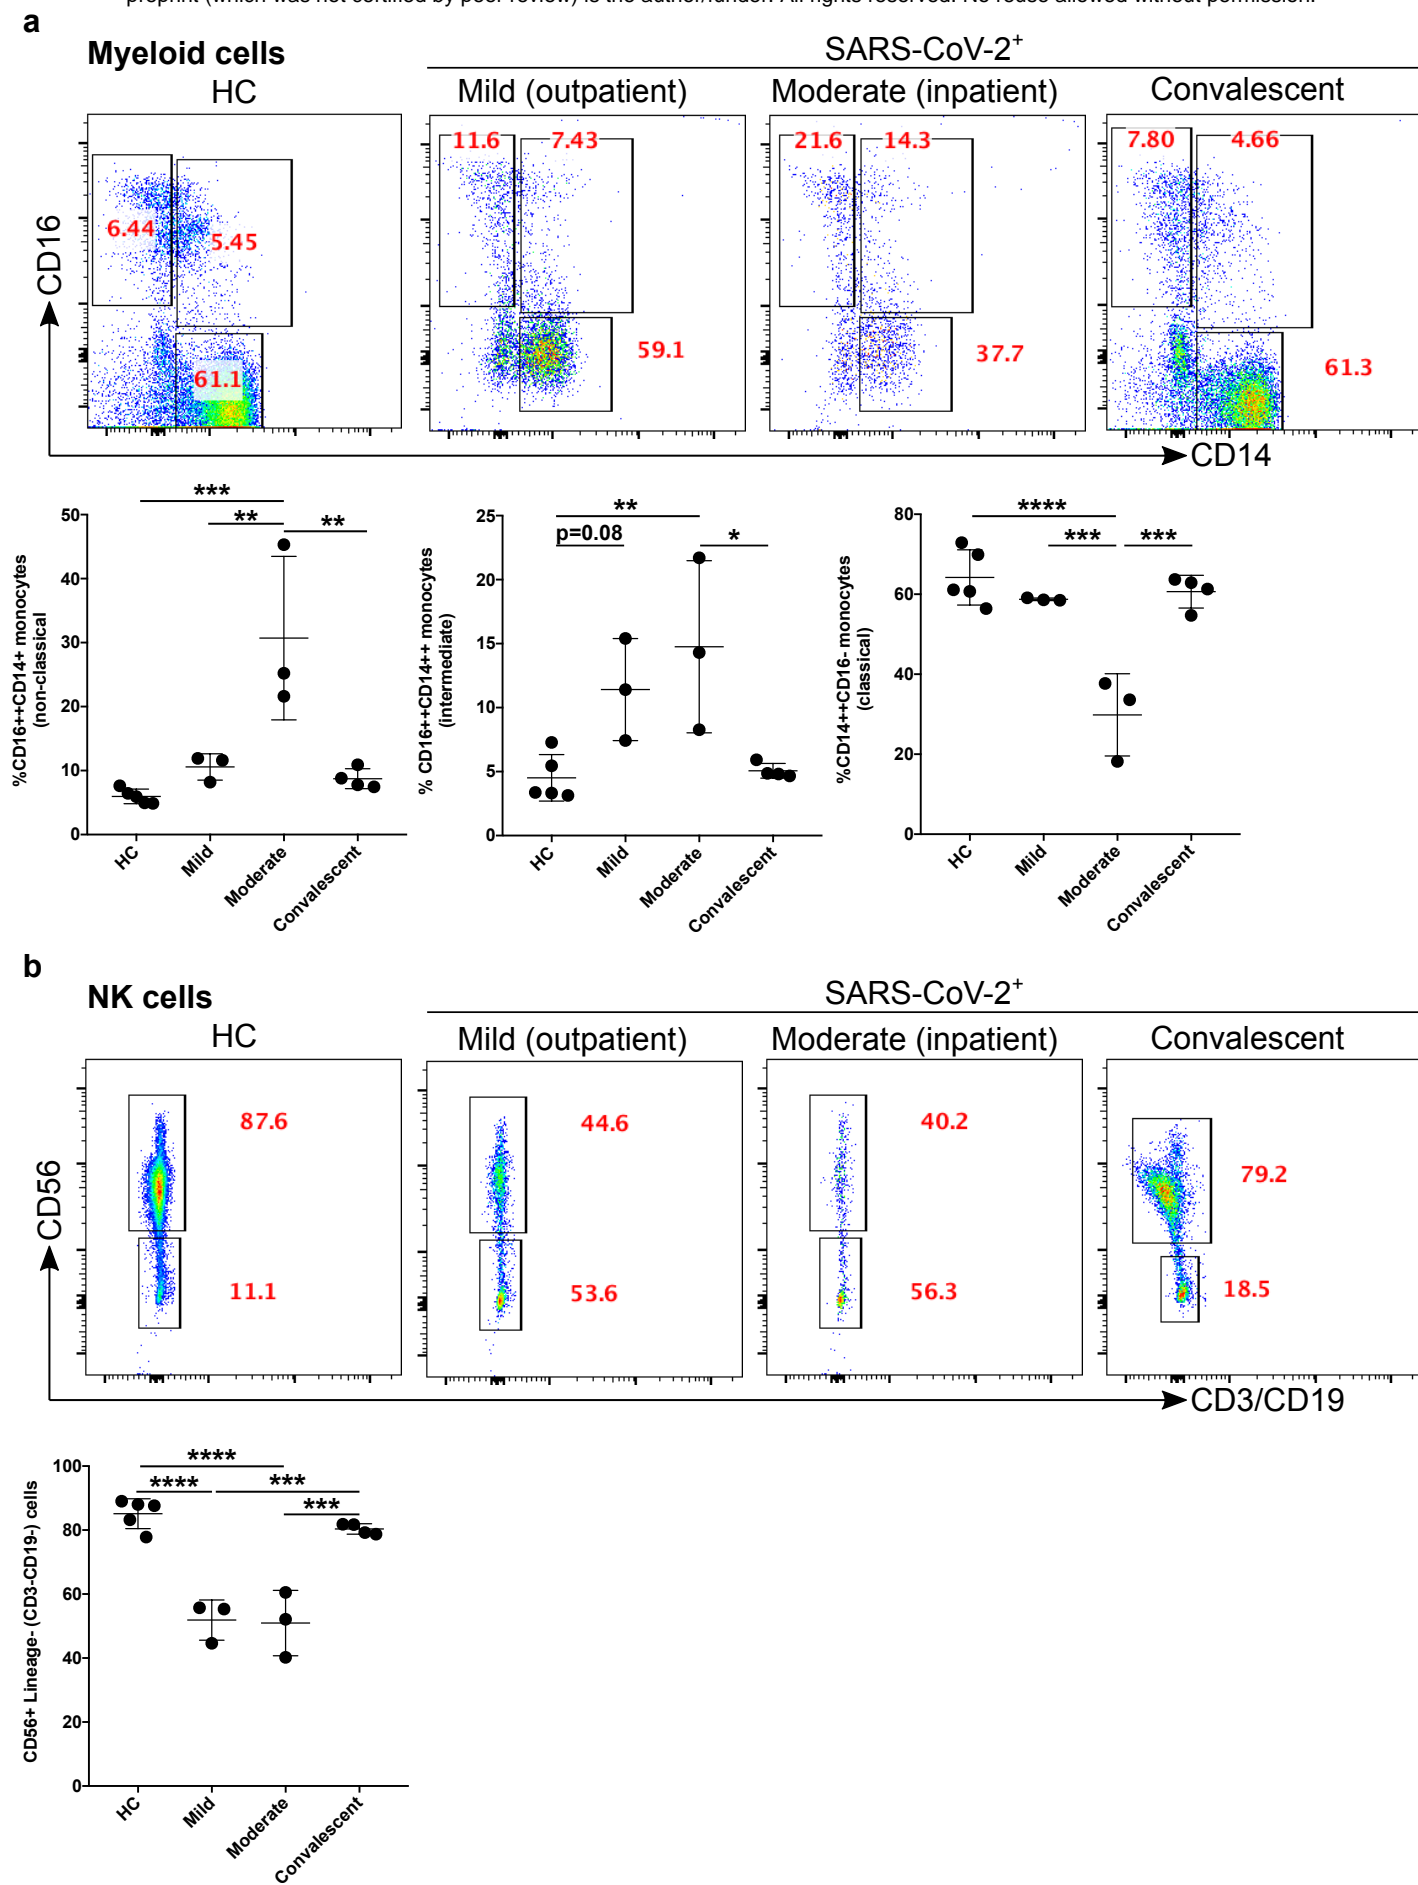

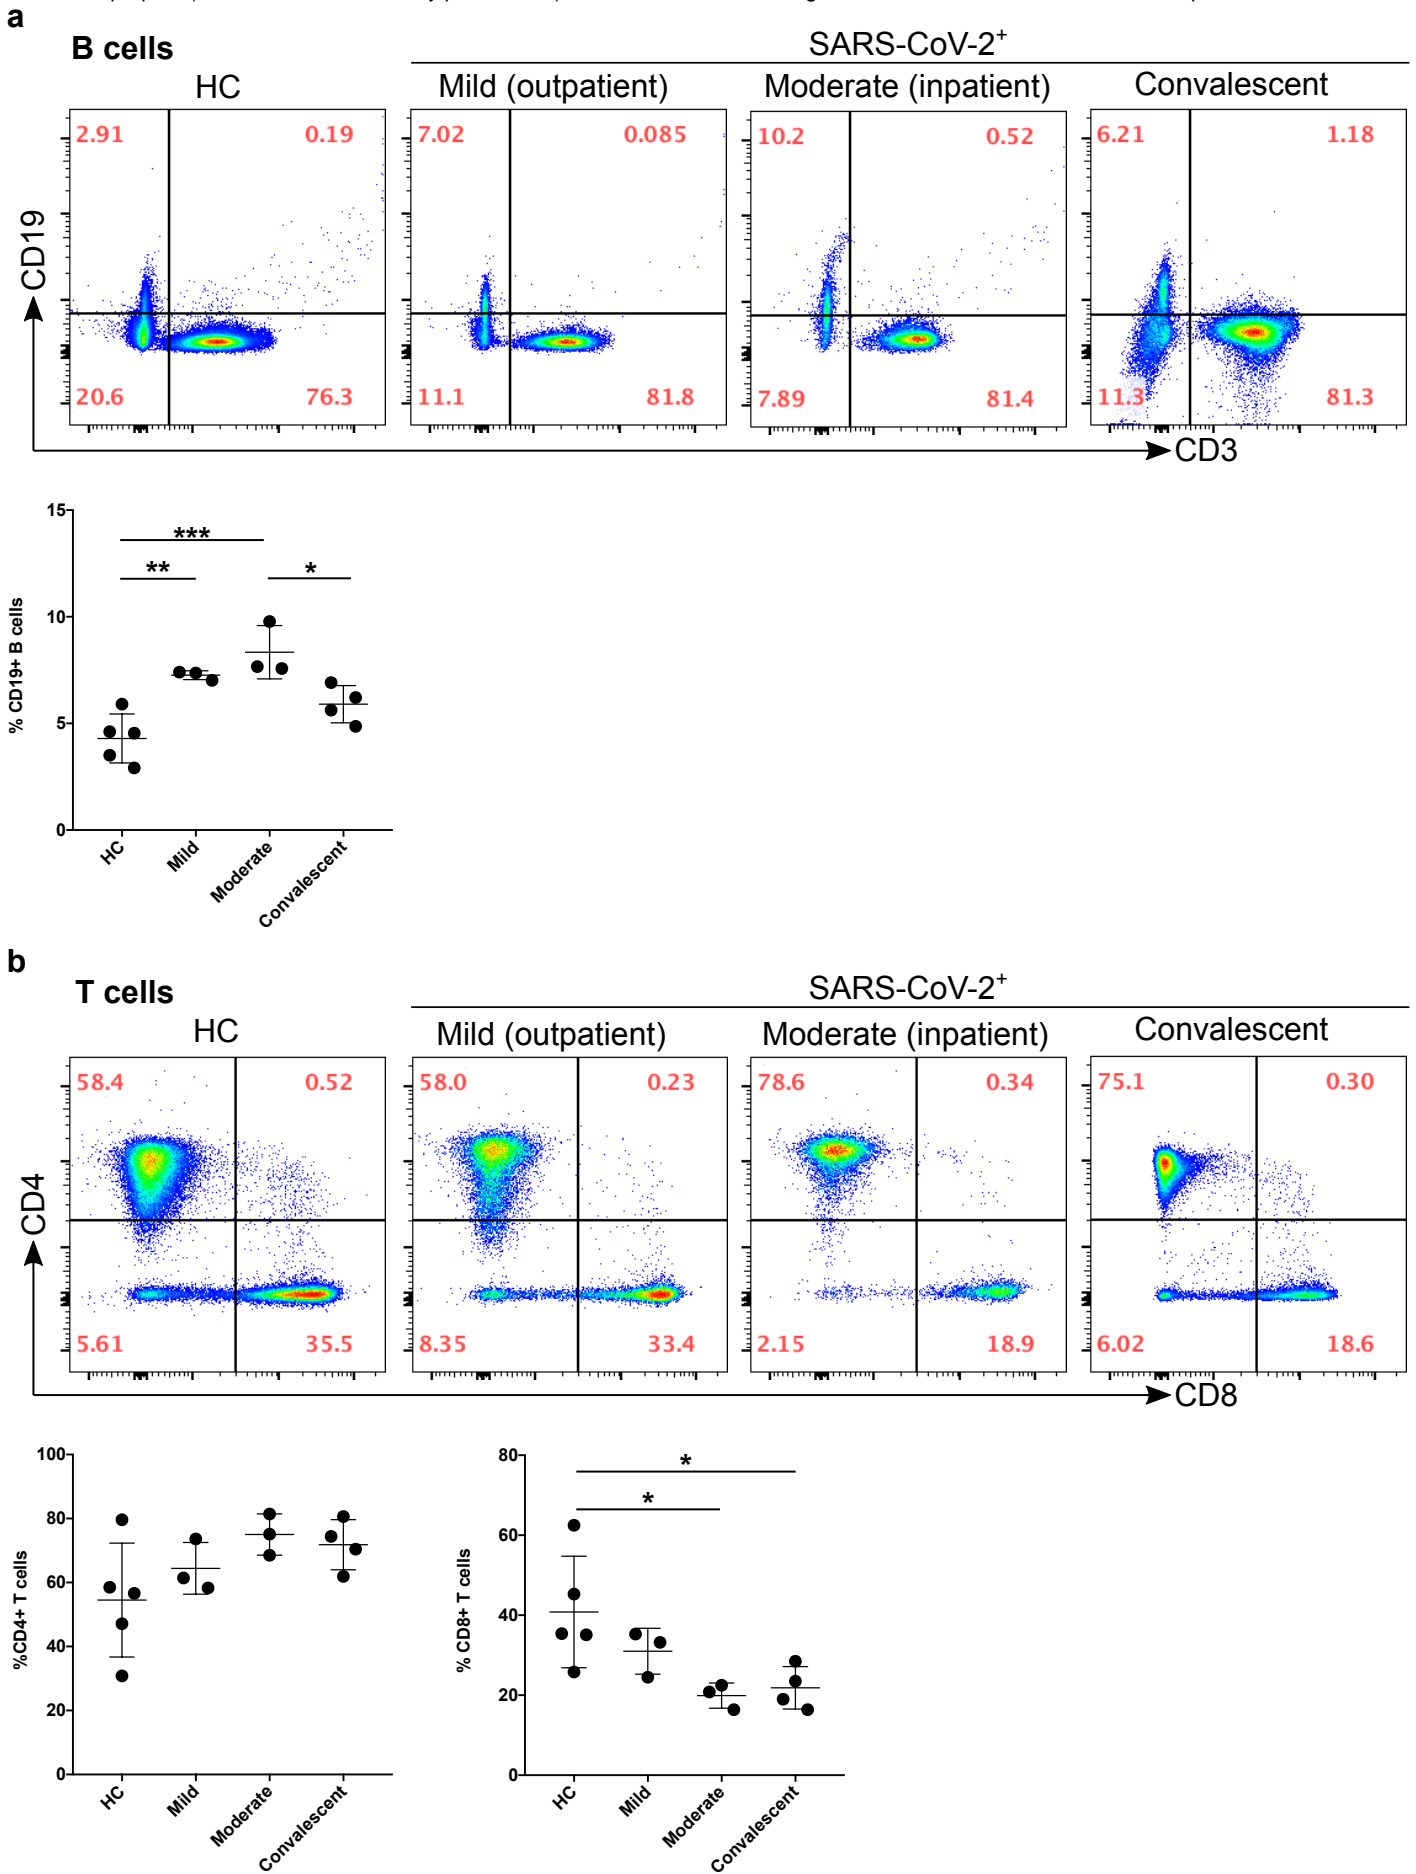

**Fig. 2**

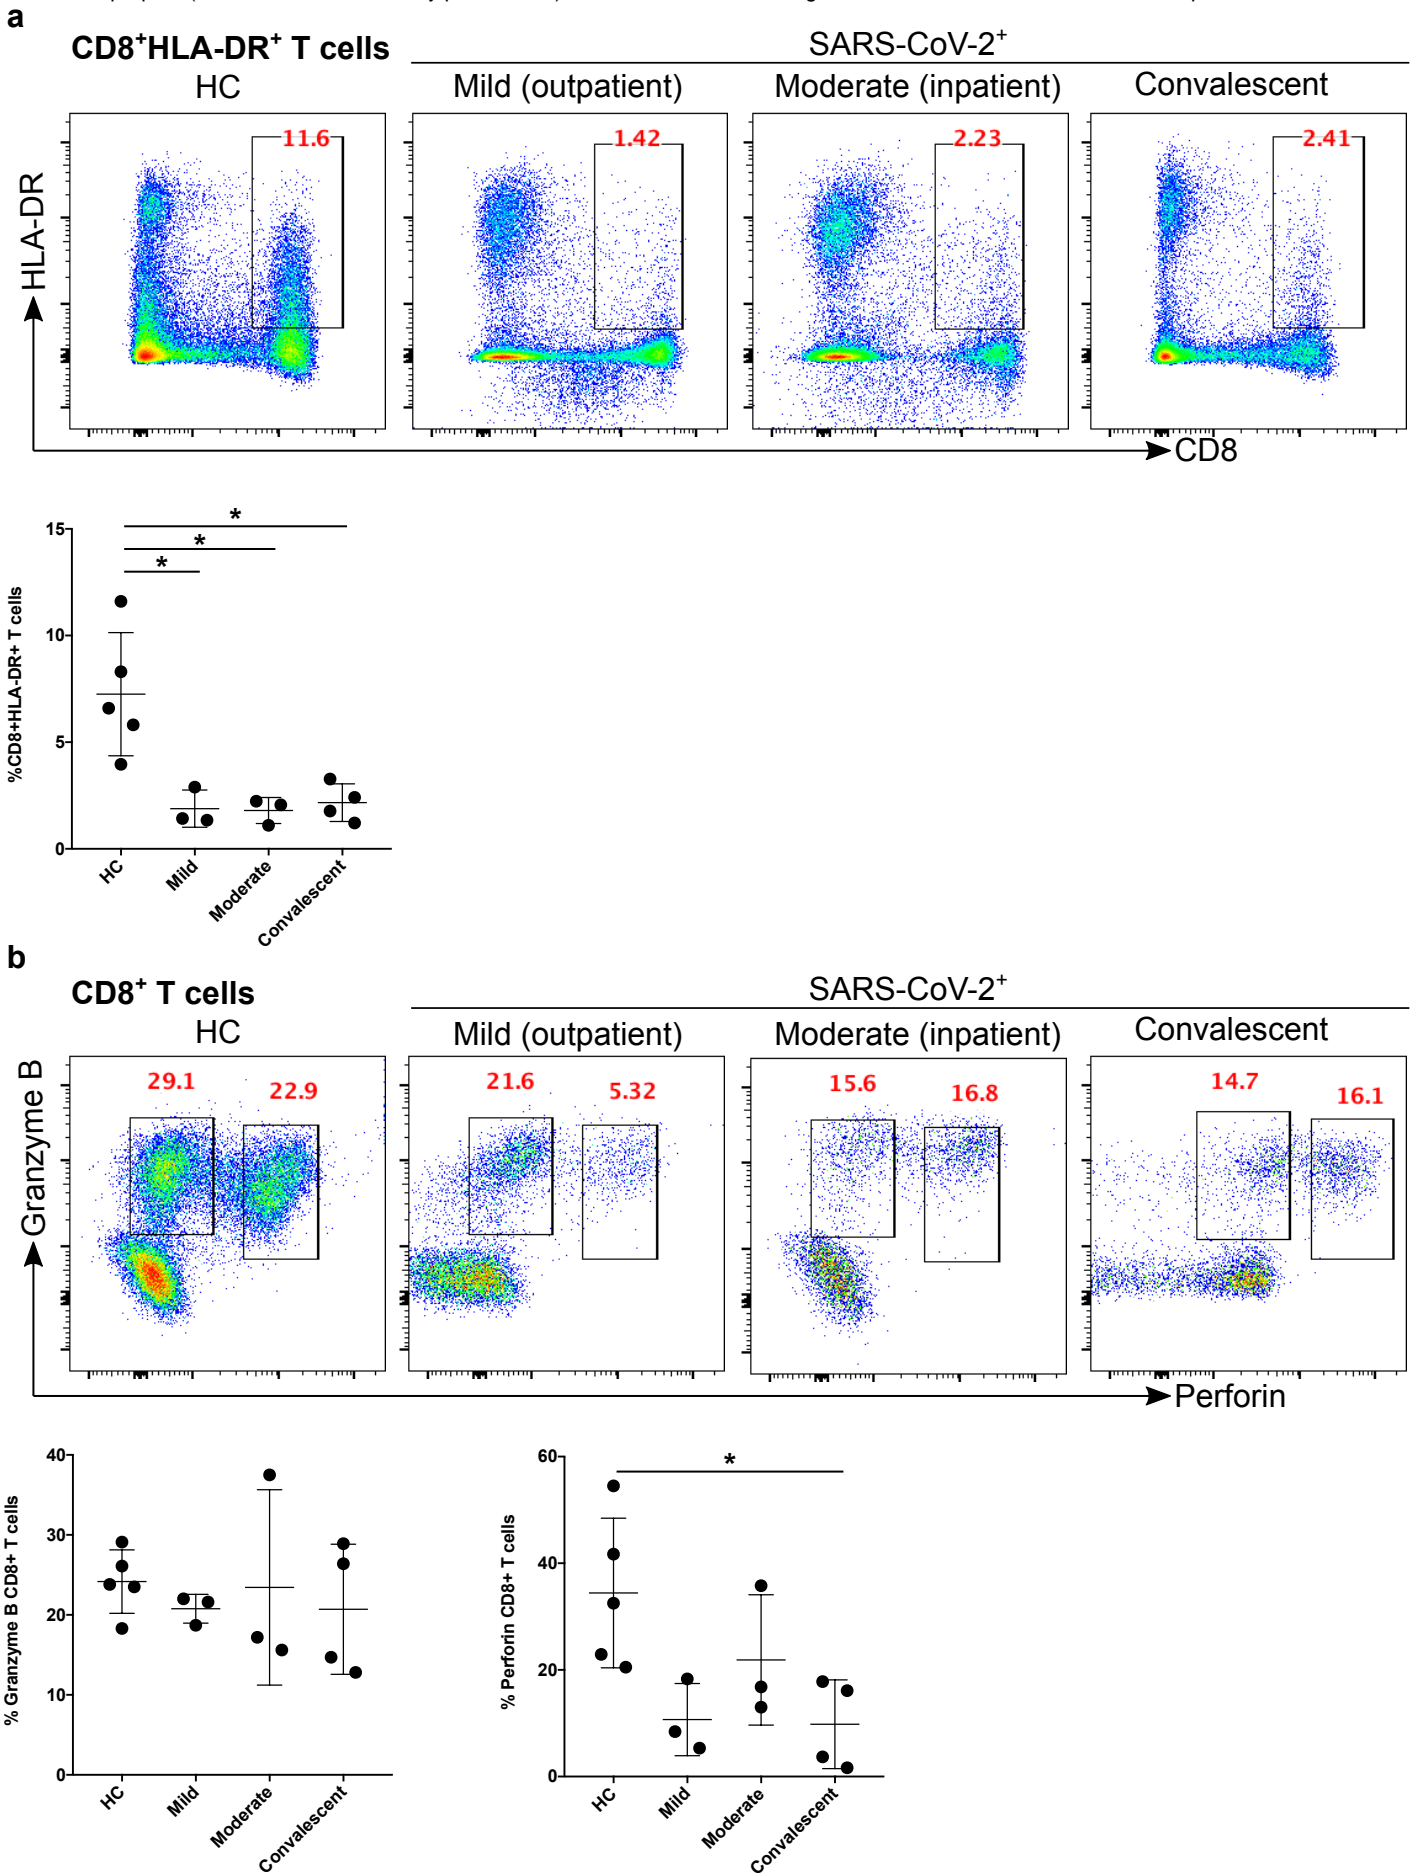

Fig. 3

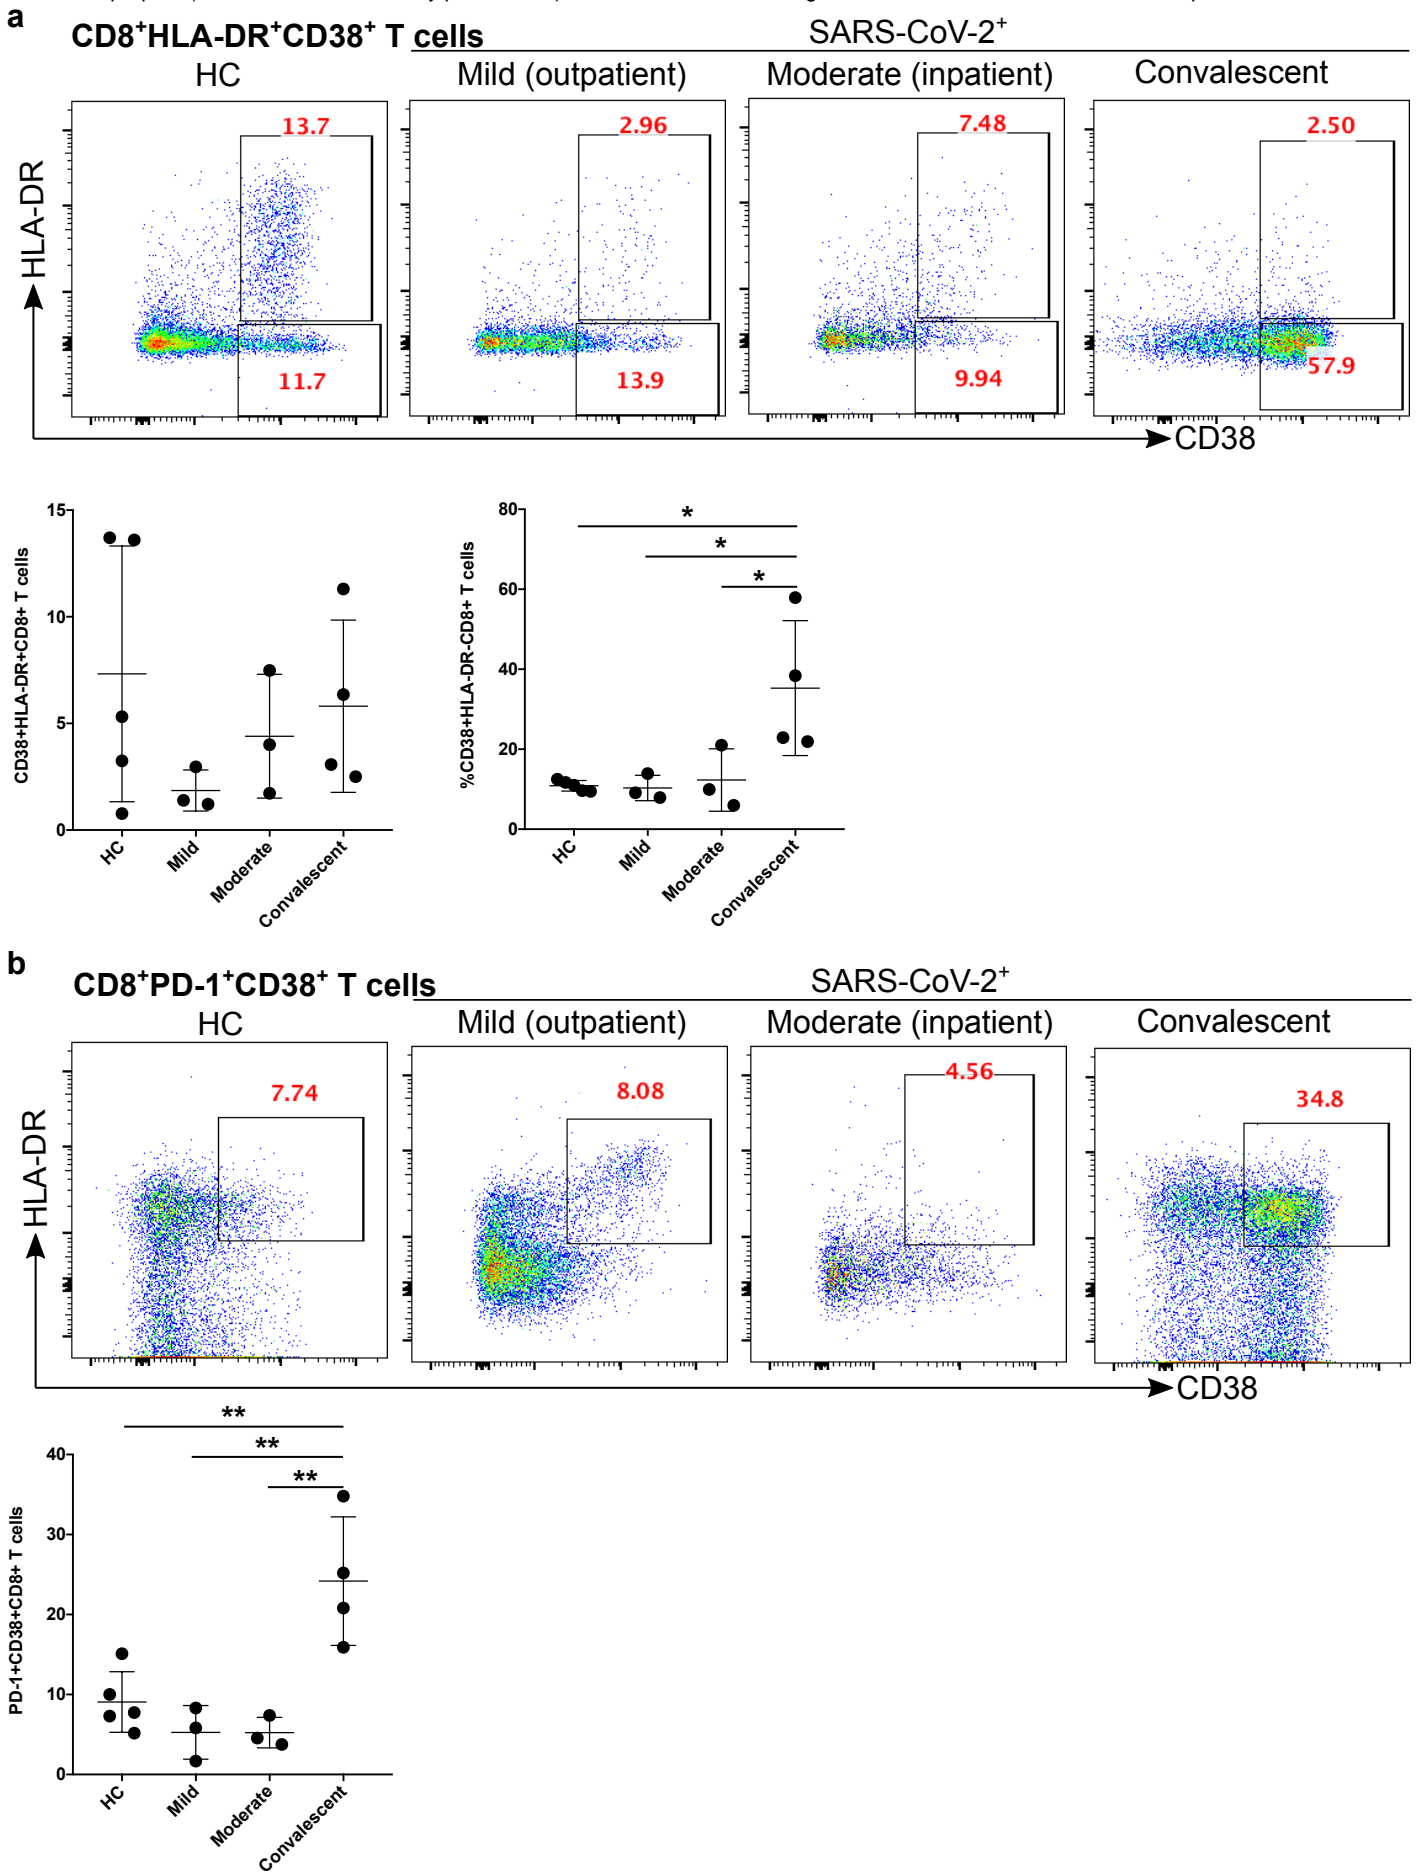



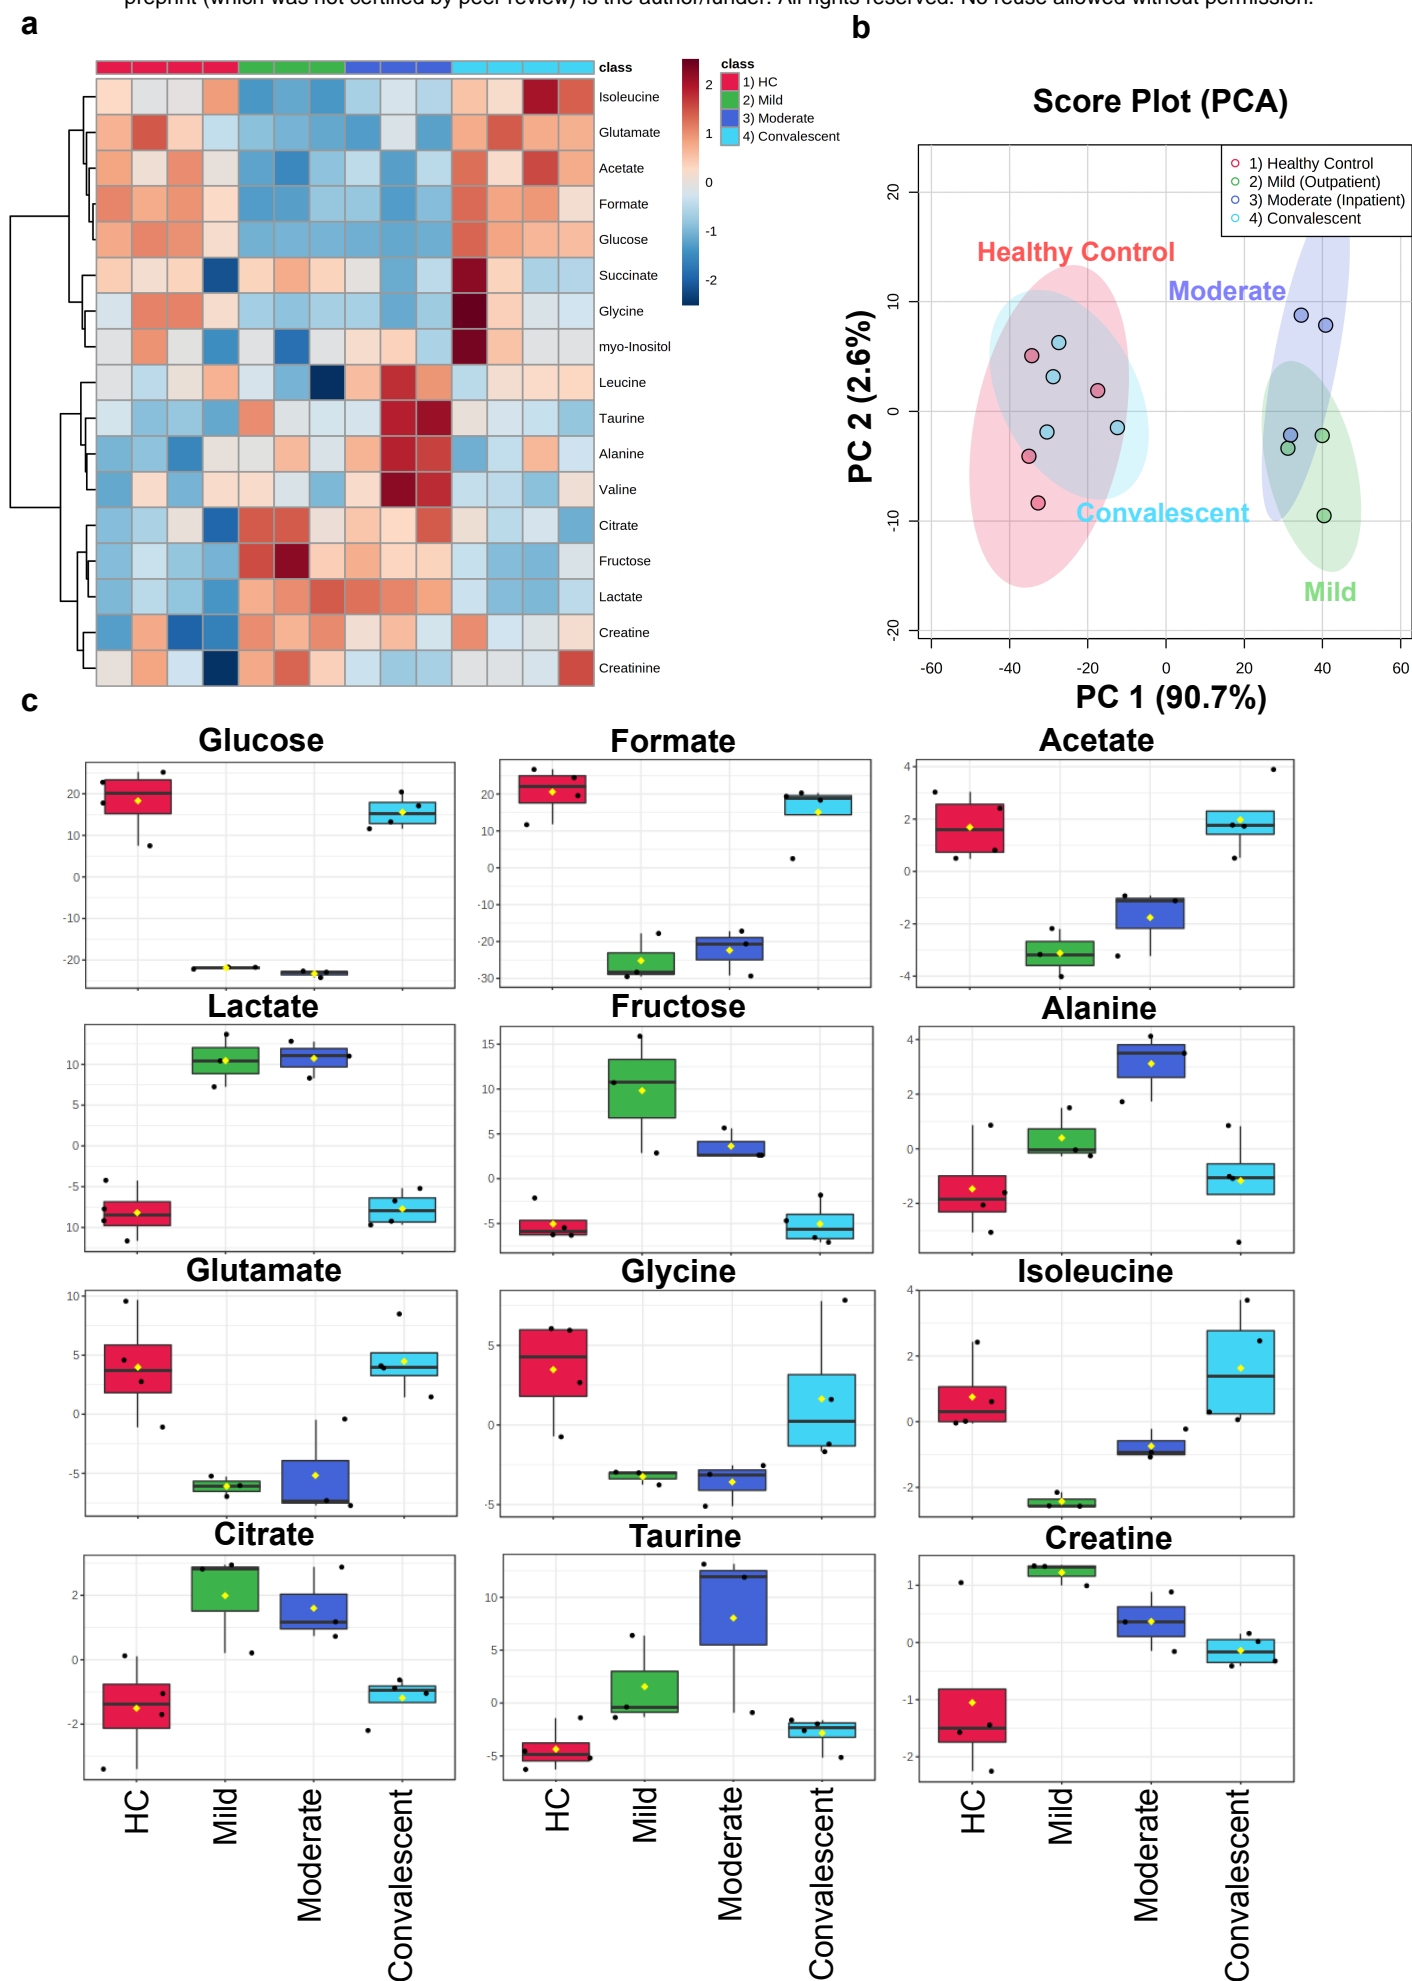

Fig. 5

**a**

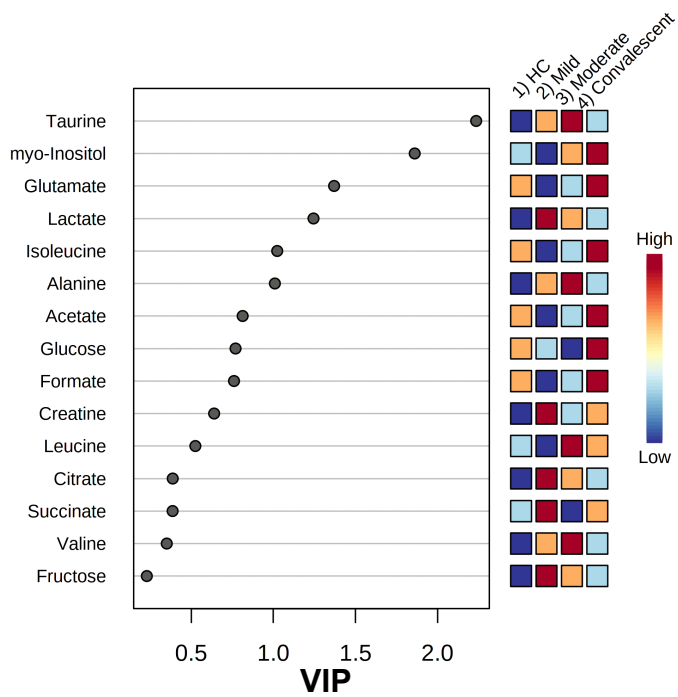

**b**

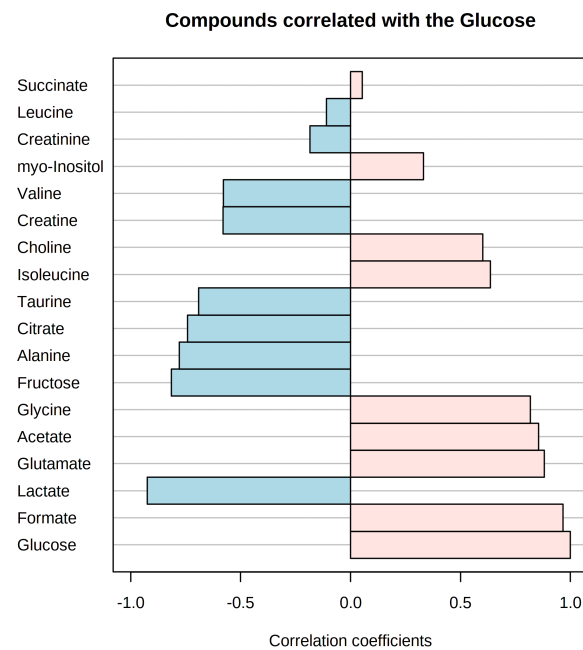

**c**

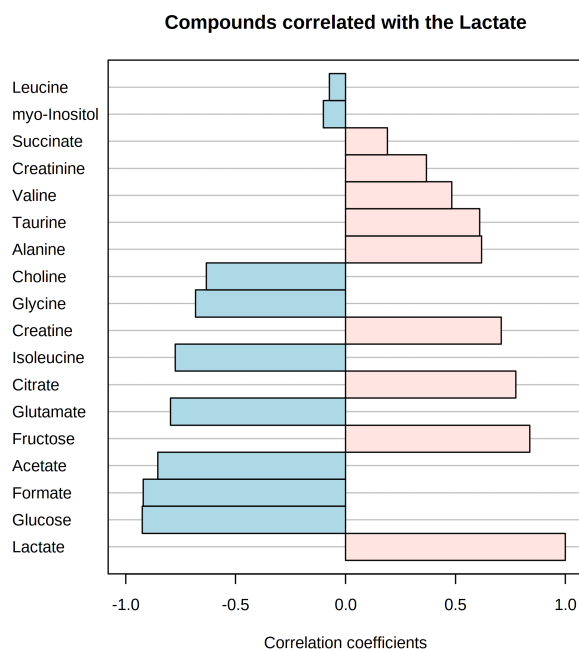

Compounds correlated with the Fructose

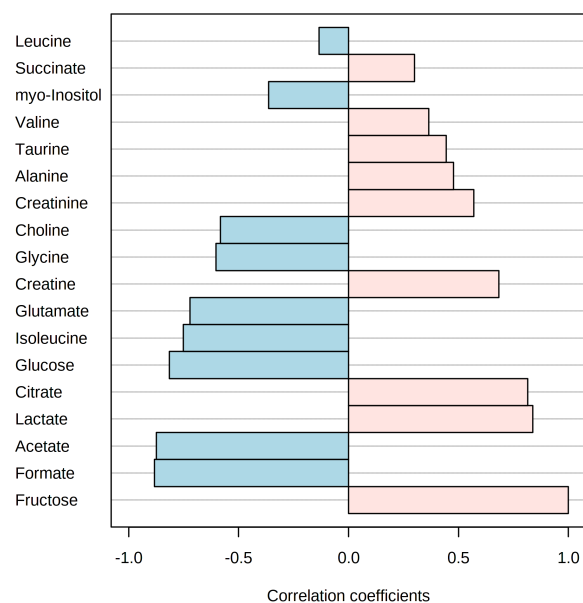

**Fig. 6**

SARS-CoV-2

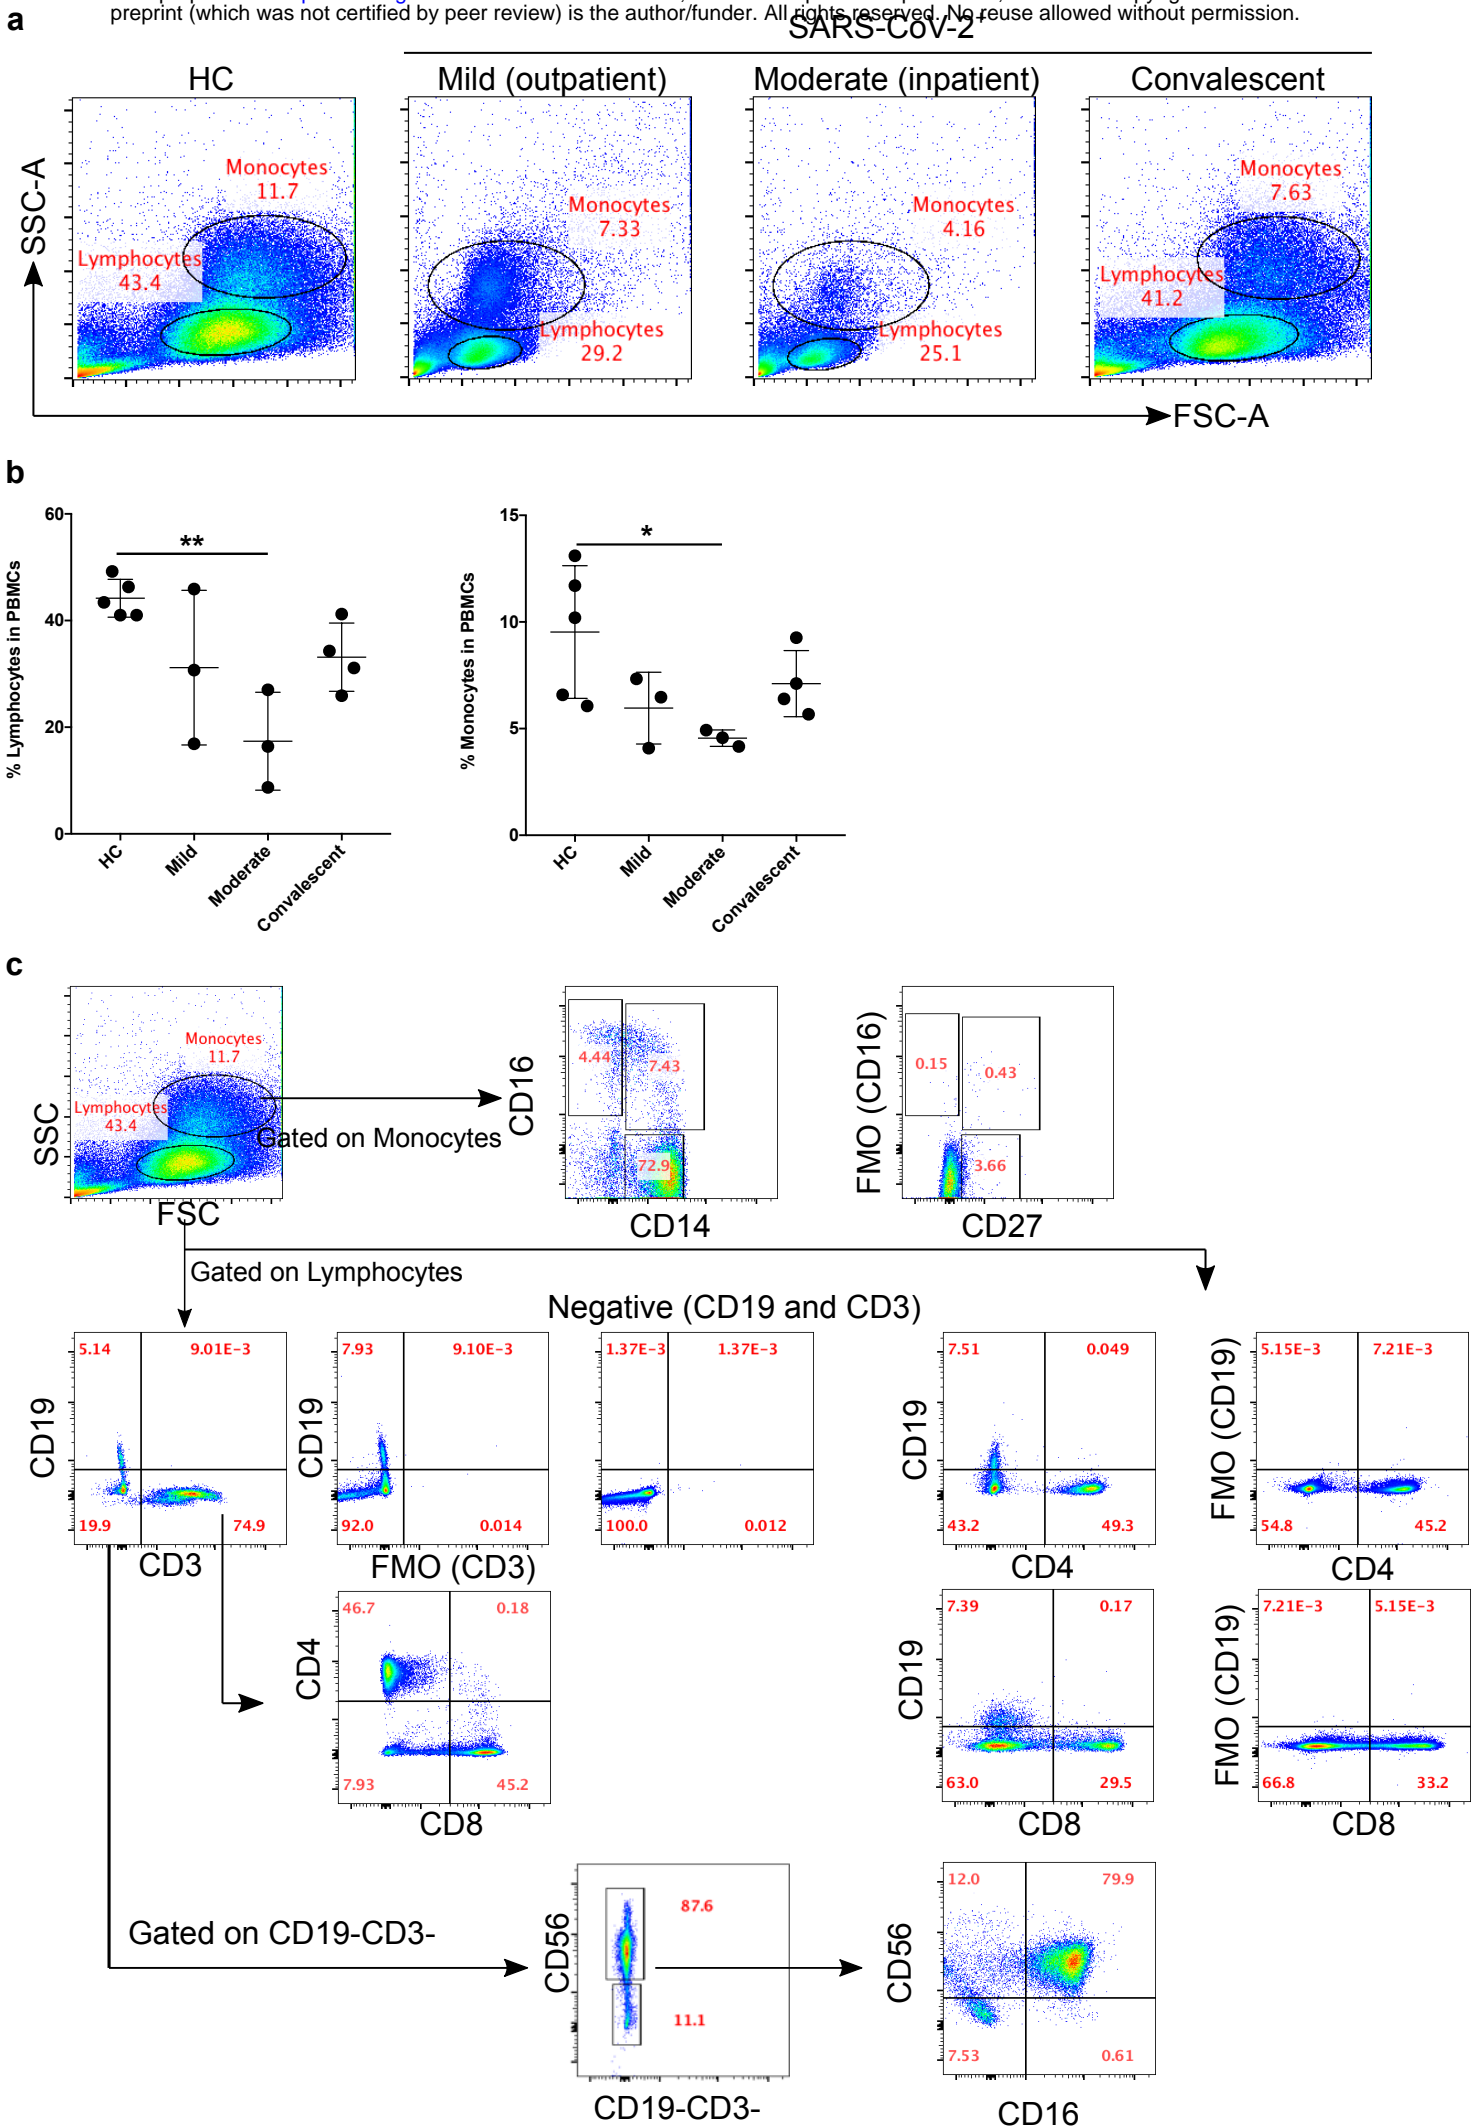

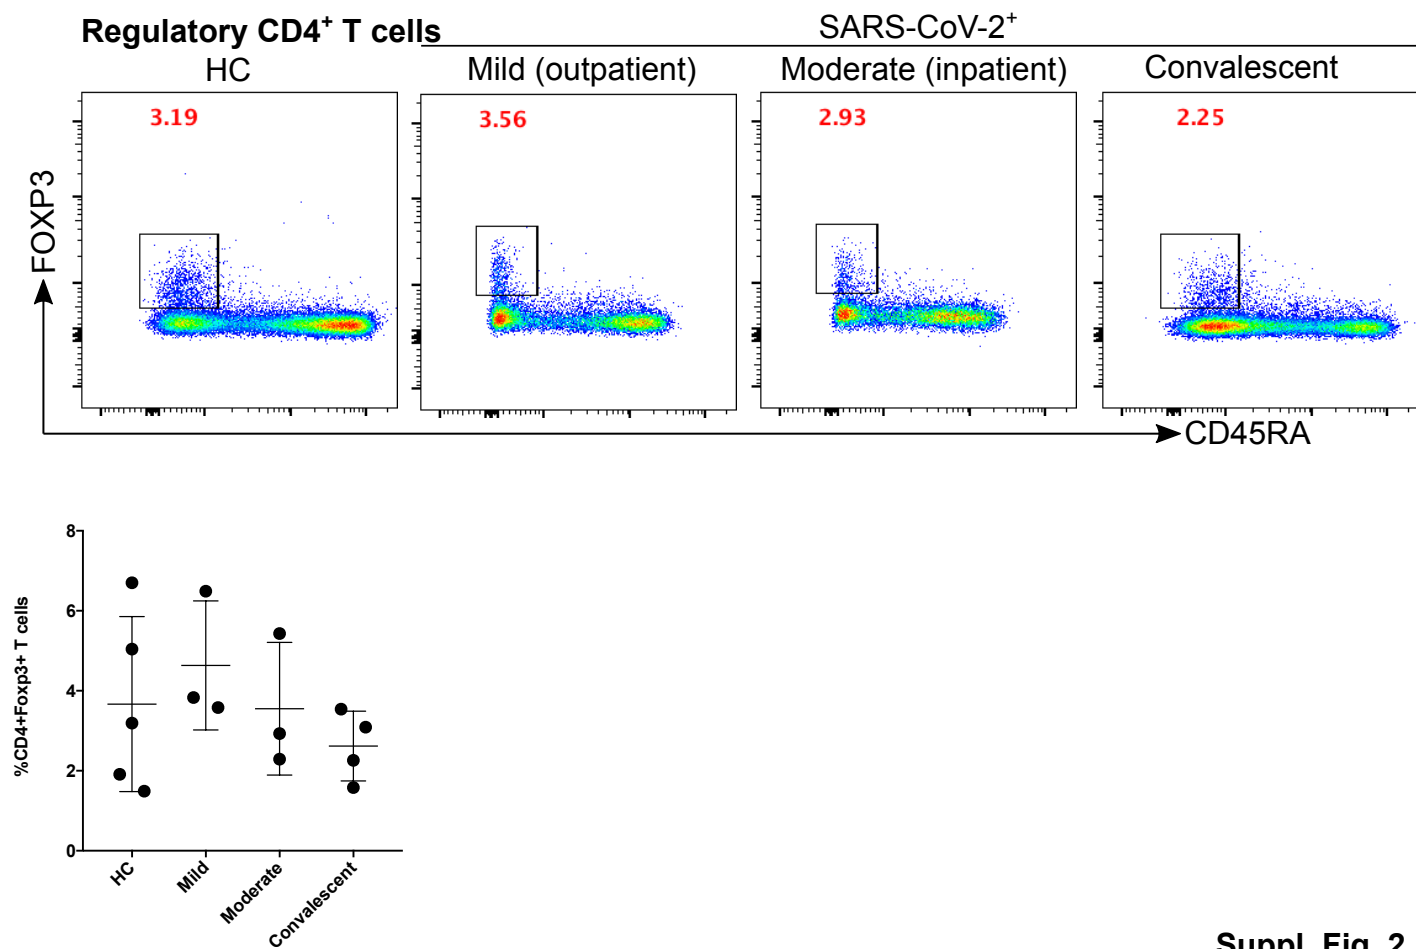

Suppl. Fig. 2

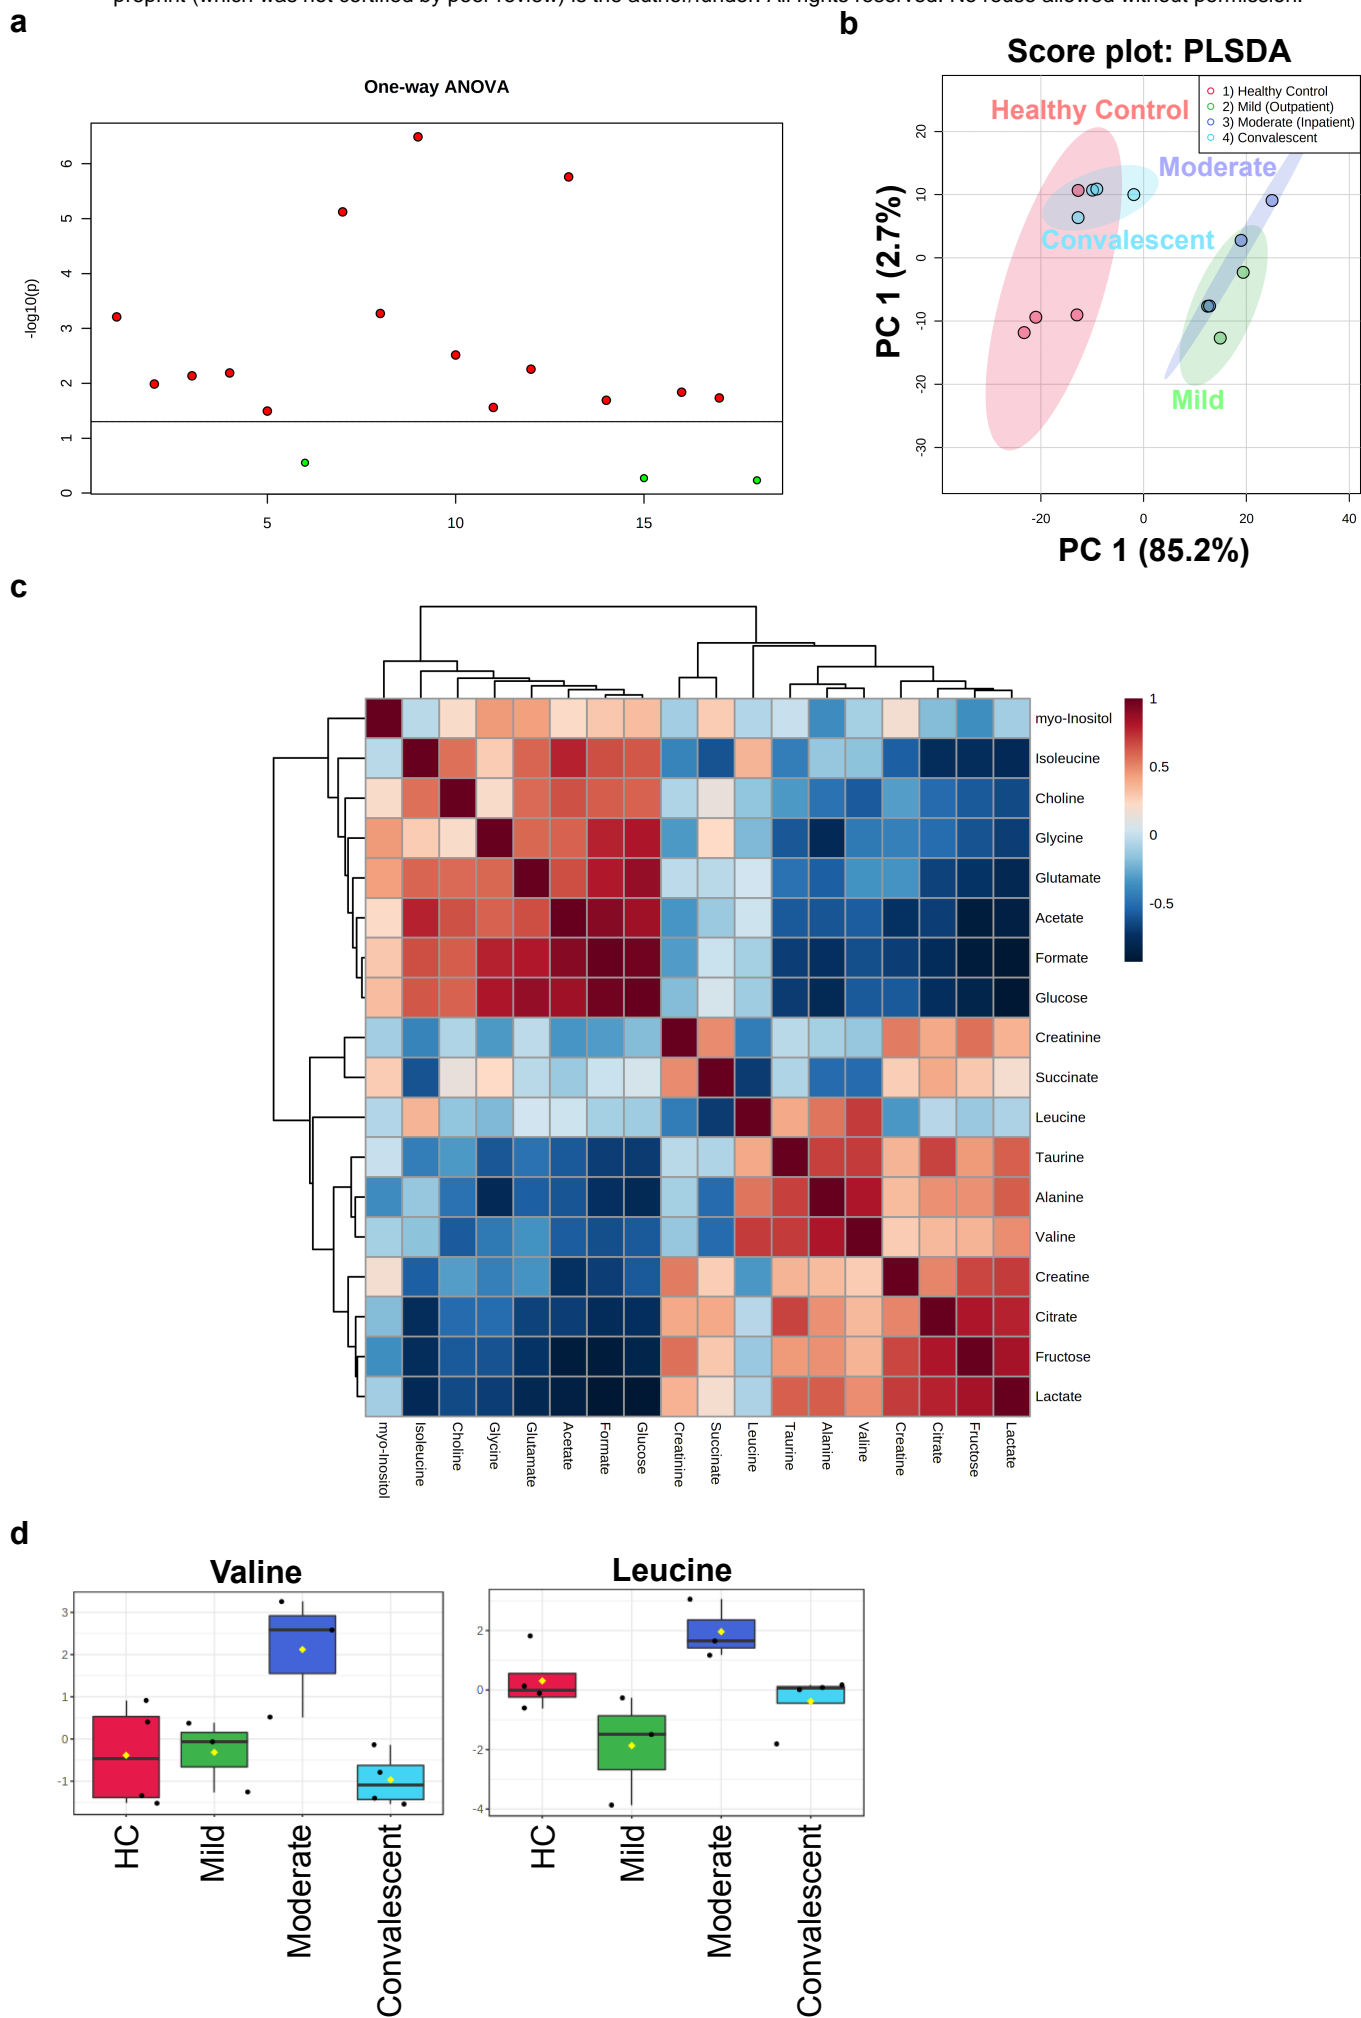

Source: https://www.biorxiv.org/content/biorxiv/early/2020/09/04/2020.09.04.282780.full.pdf
